# Supplementary material for: HGF/MET Axis Induces Tumor Secretion of Tenascin-C and Promotes Stromal Rewiring in Pancreatic Cancer
Source: MDPI journal article supplement (doi:10.3390/cancers13143519), 2021-07-14
Supplement: s1 [file s1]

# Supplementary Materials: HGF/MET Axis Induces Tumor Secretion of Tenascin-C and Promotes Stromal Rewiring in Pancreatic Cancer

Chiara Modica, Martina Olivero, Francesca Zuppini, Melissa Milan, Cristina Basilico and Elisa Vigna

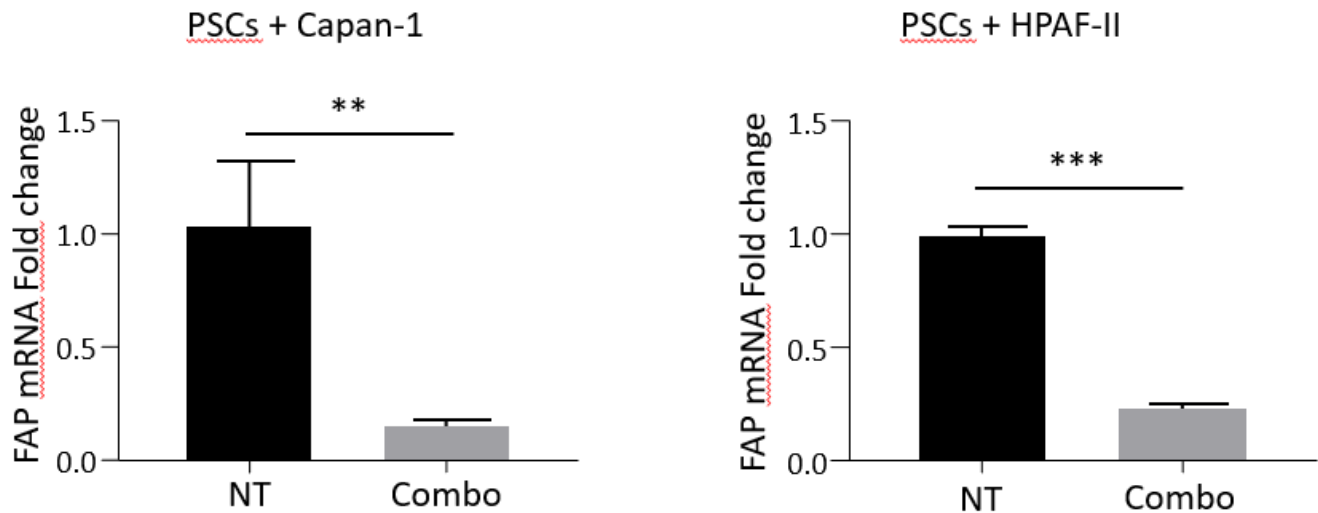

**Figure S1.** FAP-specific qRT-PCR analysis of mRNA derived from human PSCs co-cultured with Capan-1 (left panel) or HPAF-II (right panel) PDAC cells and treated with MvDN30 and DecoyMET<sup>K842E</sup> in combination (Combo). Data are expressed as fold change values relative to the untreated controls (NT). Each bar represents the average value  $\pm$  SD. Student T test: \*\*,  $p \leq 0.01$ ; \*\*\*,  $p \leq 0.001$ . Data reported in figure are representative of at least 3 independent experiments.

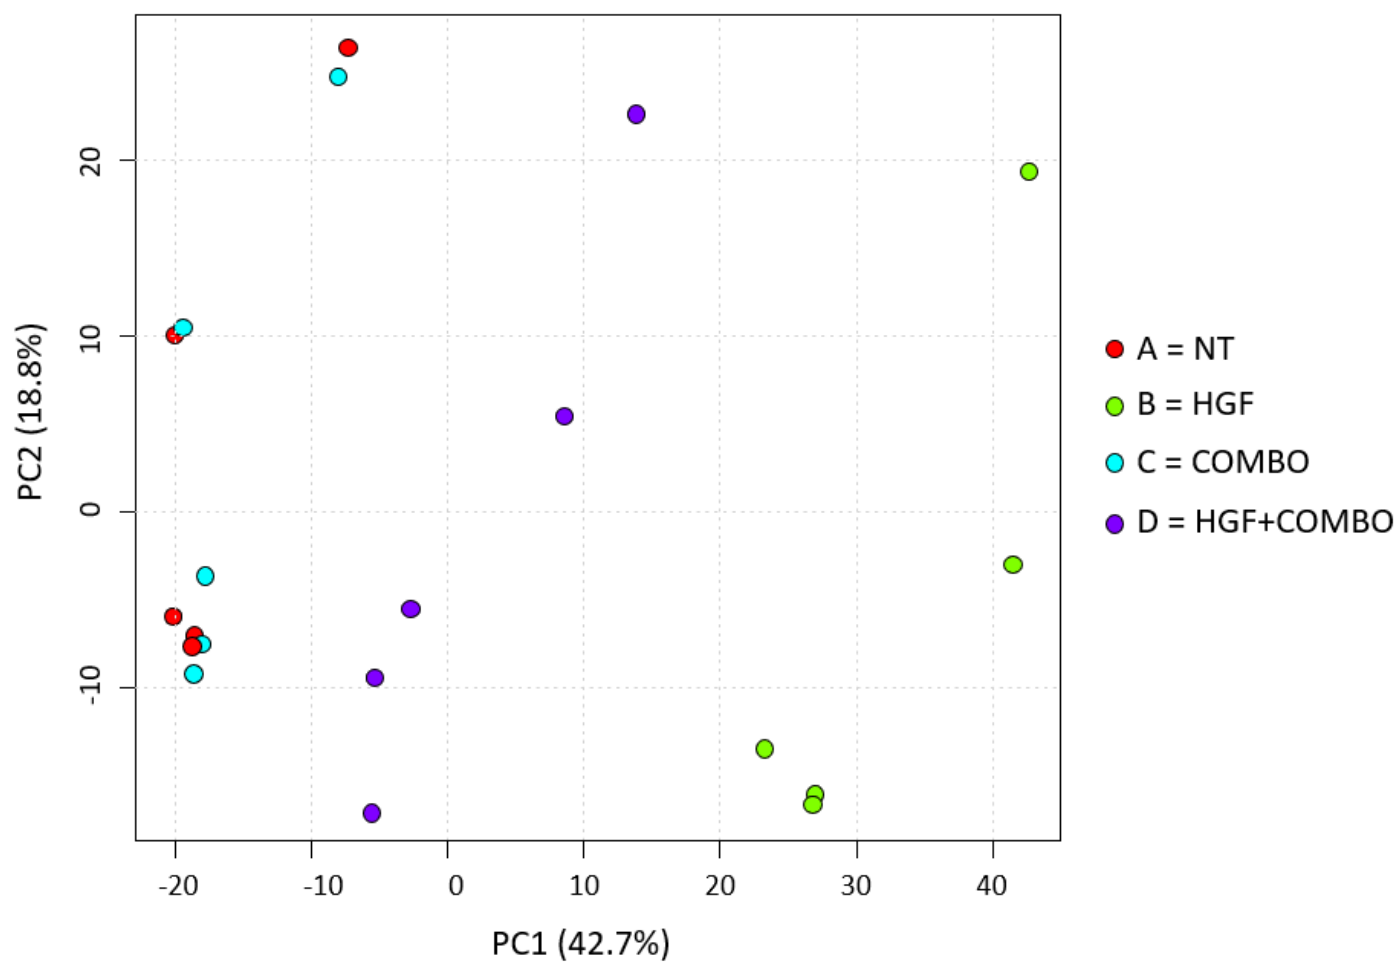

**Figure S2.** Principal Component Analysis (PCA) of the normalized RNAseq data. The plot shows the variance of 5 replicates for each experimental treatment. Samples are color-coded by the treatment. Each dot represents a sample.

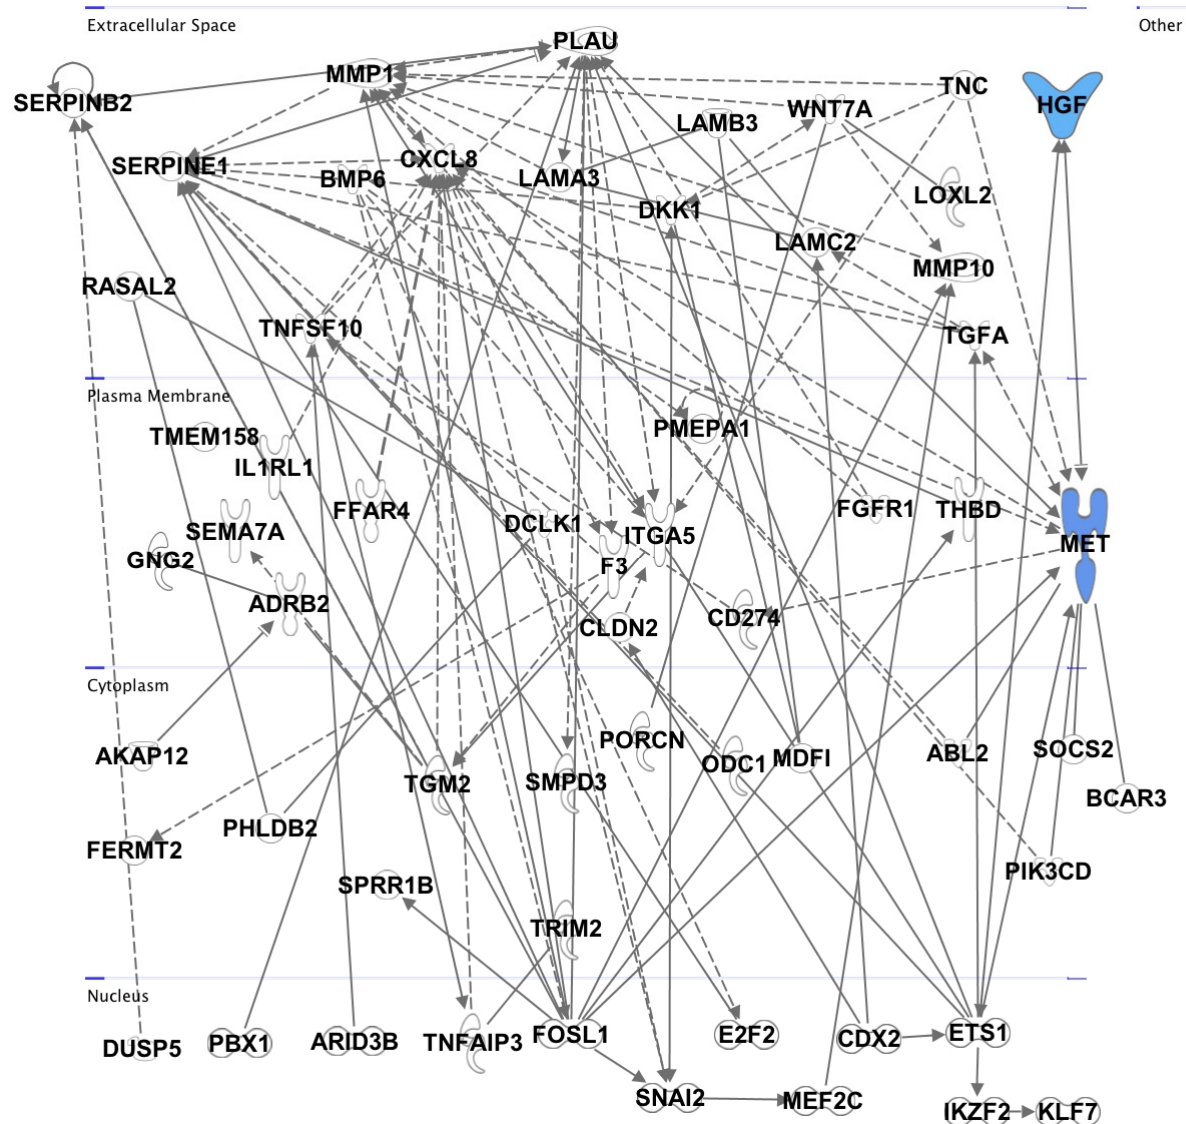

**Figure S3.** Functional network generated by Ingenuity Pathway Analysis (IPA) of differentially regulated genes in HGF-treated versus HGF + Combo-treated HPAF-II cells. The network includes genes involved in direct or indirect interactions with HGF and/or MET. Nodes represent genes; solid and dotted lines represent direct and indirect biological relationships between nodes, respectively.

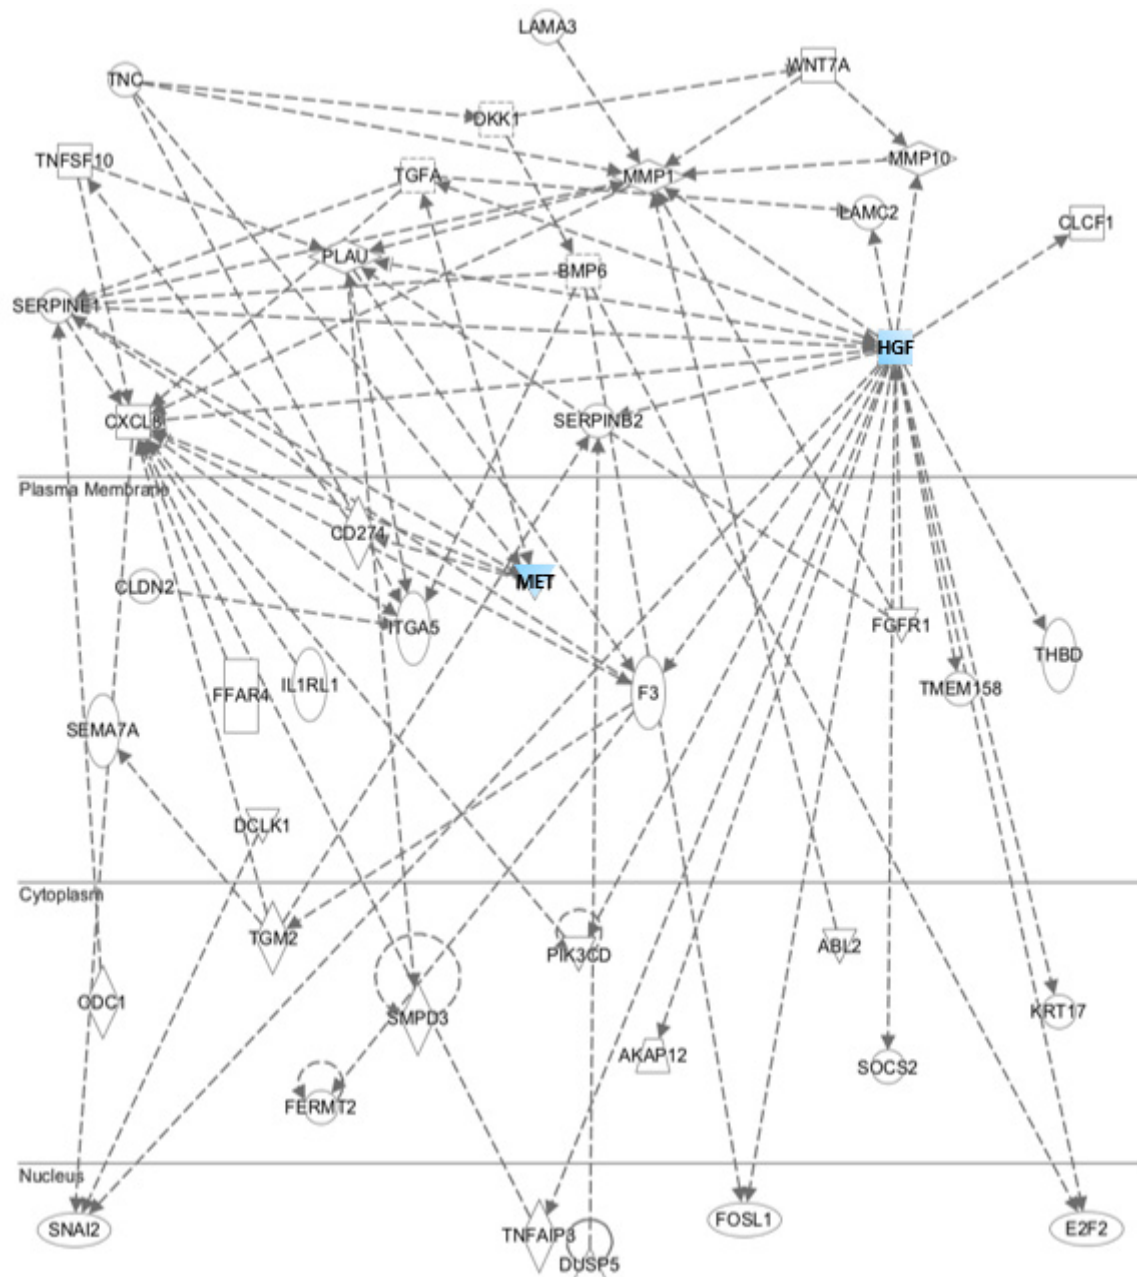

**Figure S4.** Functional network generated by Ingenuity Pathway Analysis (IPA) of differentially regulated genes in HGF-treated versus HGF + Combo-treated HPAF-II cells. The network includes genes involved in indirect interactions with HGF and/or MET. Nodes represent genes; dotted lines represent indirect biological relationships between nodes. Genes acting as intermediate bridges between HGF/MET and TNC are included in the network.

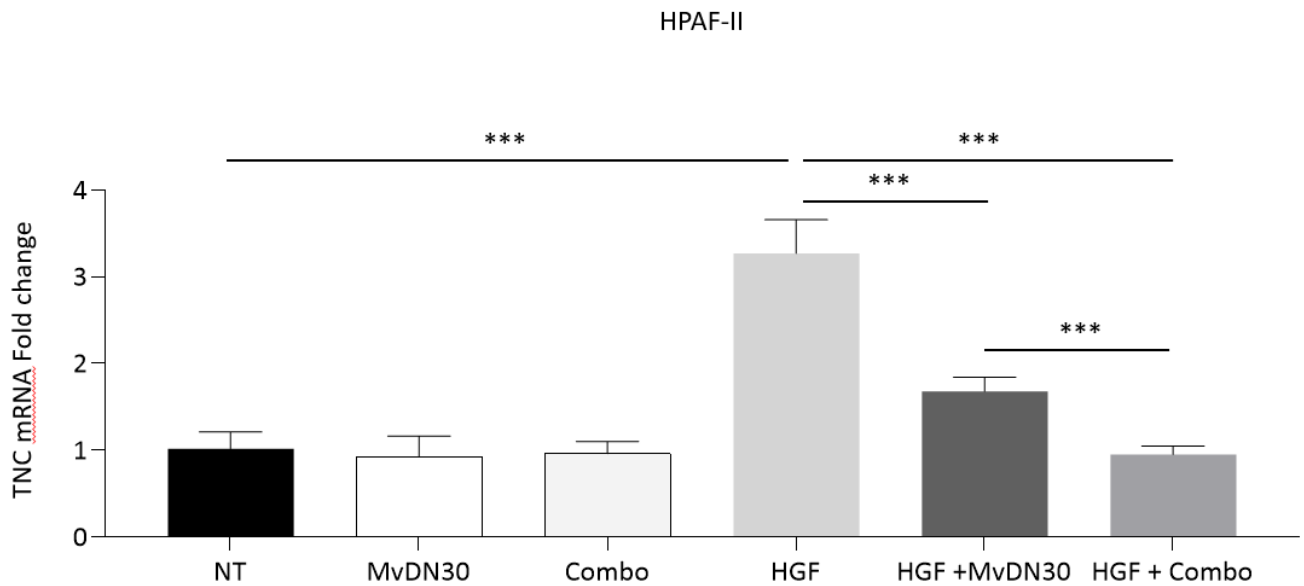

**Figure S5.** TNC-specific qRT-PCR analysis of mRNA derived from human HPAF-II treated with MvDN30 alone or MvDN30 and DecoyMET<sup>K842E</sup> in combination (Combo), with or without HGF. Data are expressed as fold change values relative to the untreated controls (NT). Each bar represents the average value  $\pm$  SD. Student T test: \*\*\*,  $p \leq 0.001$ . Data reported in figure are representative of at least 3 independent experiments.

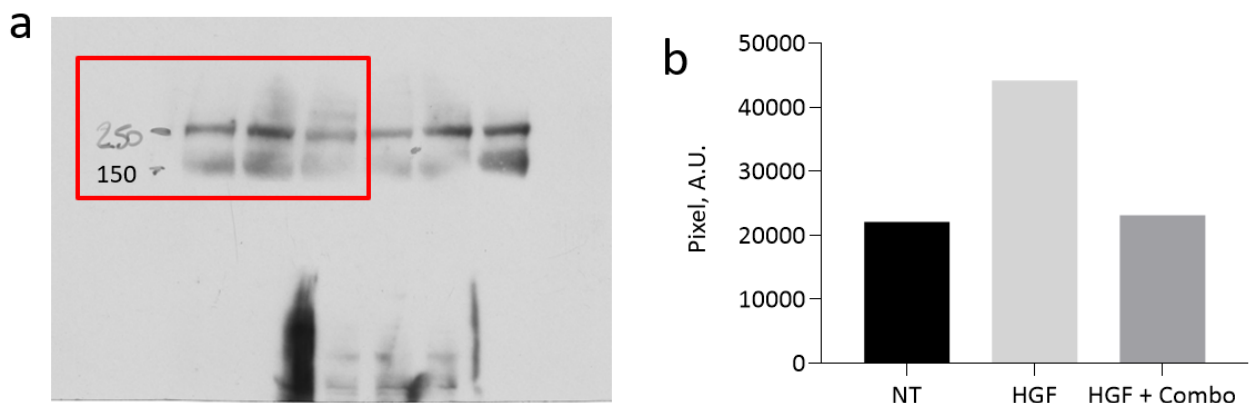

**Figure S6.** Activation of the HGF/MET axis modulates TNC secretion in human PDAC cells in vitro. Immunoblotting analysis of TNC expression in the supernatants of HPAF-II cells treated with HGF alone (HGF) or in combination with MvDN30 and DecoyMET<sup>K842E</sup> (HGF + Combo). NT: Not treated cells. a) Raw data. b) Graph reporting TNC bands intensity measured by densitometry.

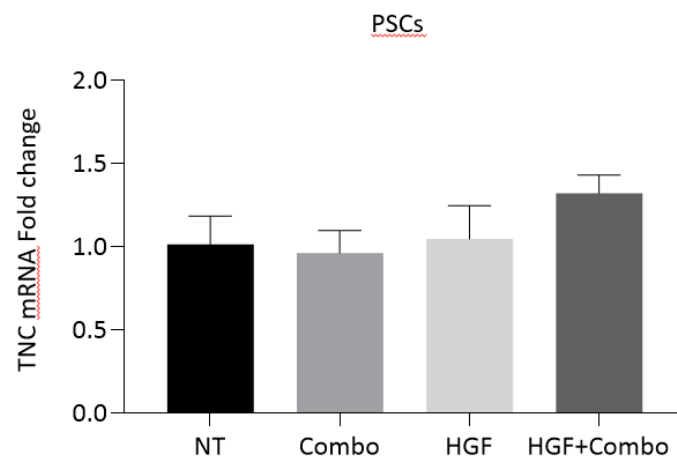

**Figure S7.** TNC-specific qRT-PCR analysis of mRNA derived from human PSCs treated with MvDN30 and DecoyMET<sup>K842E</sup> in combination (Combo), HGF, or HGF+Combo. Data are expressed as fold change values relative to the untreated controls (NT). Each bar represents the average value  $\pm$  SD. No statistically relevant differences were scored (Student T test). Data reported in figure are representative of at least 2 independent experiments.

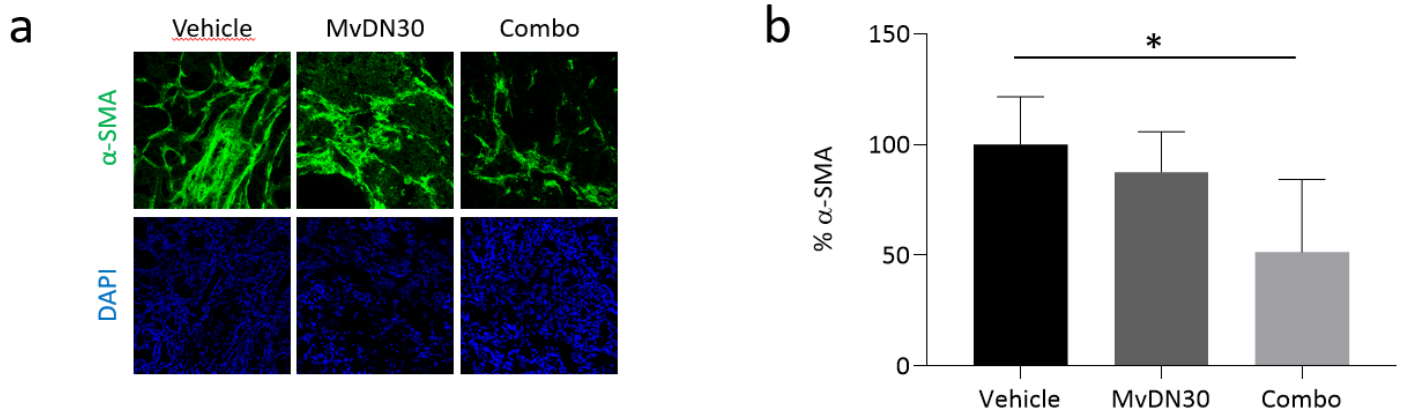

**Figure S8.** MvDN30 and decoyMET<sup>K842E</sup> in combination attenuate stromal activation *in vivo* more effectively than MvDN30 alone. Primary tumors excised from hHGF-Ki mice injected orthotopically with HPAF-II human PDAC cells and treated with Vehicle, MvDN30, or MvDN30 and DecoyMET<sup>K842E</sup> in combination (Combo) were analysed for  $\alpha$ -SMA expression by immunofluorescence. a) Representative confocal sections showing  $\alpha$ -SMA in green and DAPI in blue. b) Bar graphs showing the quantification of  $\alpha$ -SMA signal. Data are expressed as percentage of the control  $\pm$  SEM. Student T test: \*,  $p \leq 0.05$ . Data reported in figure are representative of at least 2 independent experiments.
