# Supplementary material for: HGF/MET Axis Induces Tumor Secretion of Tenascin-C and Promotes Stromal Rewiring in Pancreatic Cancer
Source: MDPI journal article supplement (doi:10.3390/cancers13143519), 2021-07-14
Supplement: s1 [file s1]

Suppl. Table S1: differentially expressed genes (untreated vs HGF-tr

| symbol    | ensembl gene ID | baseMean    |
|-----------|-----------------|-------------|
| DCLK1     | ENSG00000133083 | 80.09512513 |
| SEMA7A    | ENSG00000138623 | 660.8415079 |
| KRT6A     | ENSG00000205420 | 258.453552  |
| SERPINB2  | ENSG00000197632 | 38.70119509 |
| IL1RL1    | ENSG00000115602 | 121.5263427 |
| NAV3      | ENSG00000067798 | 137.5987388 |
| FOSL1     | ENSG00000175592 | 3550.604451 |
| GOS2      | ENSG00000123689 | 404.0778416 |
| SPRR1B    | ENSG00000169469 | 78.46740221 |
| SNAI2     | ENSG00000019549 | 677.5414399 |
| MDGA1     | ENSG00000112139 | 174.3753749 |
| AKAP12    | ENSG00000131016 | 9348.867452 |
| MMP10     | ENSG00000166670 | 465.9168215 |
| ADRB2     | ENSG00000169252 | 175.5422005 |
| CGB5      | ENSG00000189052 | 283.0807811 |
| ETS1      | ENSG00000134954 | 4046.295936 |
| GFOD1     | ENSG00000145990 | 401.3280088 |
| ZBED2     | ENSG00000177494 | 1490.207275 |
| LOXL2     | ENSG00000134013 | 204.5301296 |
| WNT7A     | ENSG00000154764 | 84.15711755 |
| RFX8      | ENSG00000196460 | 28.53968987 |
| FERMT2    | ENSG00000073712 | 169.7284614 |
| C12orf56  | ENSG00000185306 | 40.60165631 |
| KRTAP3-1  | ENSG00000212901 | 46.58484262 |
| SH2D5     | ENSG00000189410 | 140.8666619 |
| KIAA1462  | ENSG00000165757 | 116.7288908 |
| PTRF      | ENSG00000177469 | 550.3948887 |
| TNFAIP3   | ENSG00000118503 | 428.39922   |
| SERPINE1  | ENSG00000106366 | 301.1912867 |
| ARID3B    | ENSG00000179361 | 336.8937291 |
| SPOCD1    | ENSG00000134668 | 200.5265721 |
| LAMC2     | ENSG00000058085 | 18541.09977 |
| KIAA1549L | ENSG00000110427 | 489.8754674 |
| FST       | ENSG00000134363 | 14.07590594 |
| CHST11    | ENSG00000171310 | 1120.380823 |
| KLF7      | ENSG00000118263 | 676.2839586 |
| PEAR1     | ENSG00000187800 | 501.4462066 |
| FAM83A    | ENSG00000147689 | 2896.599308 |
| CD274     | ENSG00000120217 | 199.3455825 |
| TMEM158   | ENSG00000249992 | 84.43891325 |
| OSBP2     | ENSG00000184792 | 455.7582992 |

|          |                  |             |
|----------|------------------|-------------|
| BCAR3    | ENSG000000137936 | 1370.100618 |
| GPAT3    | ENSG000000138678 | 3075.01993  |
| THBD     | ENSG000000178726 | 2775.713084 |
| GLIPR1   | ENSG000000139278 | 625.8757951 |
| CGB8     | ENSG000000213030 | 60.39984965 |
| PHLDB2   | ENSG000000144824 | 276.9070995 |
| RHOB     | ENSG000000143878 | 2332.300595 |
| NRIP3    | ENSG000000175352 | 142.7660463 |
| RELN     | ENSG000000189056 | 122.5406239 |
| MARCH_4  | ENSG000000144583 | 22.64322463 |
| PIK3CD   | ENSG000000171608 | 28.73758359 |
| DKK1     | ENSG000000107984 | 12664.45256 |
| LRRC8C   | ENSG000000171488 | 77.64135067 |
| LRAT     | ENSG000000121207 | 247.0259409 |
| TGFA     | ENSG000000163235 | 5058.000843 |
| ARHGAP29 | ENSG000000137962 | 3607.270519 |
| UPP1     | ENSG000000183696 | 1367.601191 |
| TM4SF19  | ENSG000000145107 | 137.1040702 |
| RASD1    | ENSG000000108551 | 19.87844779 |
| TNC      | ENSG000000041982 | 503.6030154 |
| S100A2   | ENSG000000196754 | 153.1717377 |
| AREG     | ENSG000000109321 | 3002.996243 |
| CPA4     | ENSG000000128510 | 223.7113163 |
| SPRR3    | ENSG000000163209 | 54.59821743 |
| STK17A   | ENSG000000164543 | 1596.855953 |
| NAV2     | ENSG000000166833 | 213.4289468 |
| ARL4C    | ENSG000000188042 | 1004.111456 |
| VEGFC    | ENSG000000150630 | 34.75797267 |
| KRT17    | ENSG000000128422 | 21.71244596 |
| ANTXR2   | ENSG000000163297 | 2243.476649 |
| TNS4     | ENSG000000131746 | 3708.595376 |
| BMP6     | ENSG000000153162 | 39.87472174 |
| MMP1     | ENSG000000196611 | 8713.390914 |
| CORO2B   | ENSG000000103647 | 78.3355581  |
| ITGA2    | ENSG000000164171 | 11158.52834 |
| TBC1D2   | ENSG000000095383 | 792.8349429 |
| TMCC3    | ENSG000000057704 | 762.8298163 |
| F3       | ENSG000000117525 | 27344.96982 |
| RP1      | ENSG000000104237 | 32.13207889 |
| HBEGF    | ENSG000000113070 | 969.0558033 |
| DHRS9    | ENSG000000073737 | 15045.50871 |
| E2F7     | ENSG000000165891 | 929.4467623 |
| IFFO2    | ENSG000000169991 | 1231.809673 |
| AKAP2    | ENSG000000241978 | 3958.887352 |

|          |                 |             |
|----------|-----------------|-------------|
| ITGA5    | ENSG00000161638 | 207.4086583 |
| MDFI     | ENSG00000112559 | 705.6600552 |
| GJB3     | ENSG00000188910 | 2580.424394 |
| LAMB3    | ENSG00000196878 | 8318.339328 |
| CAPRN2   | ENSG00000110888 | 5237.401161 |
| TUBB6    | ENSG00000176014 | 1678.107073 |
| ITPRIP   | ENSG00000148841 | 562.806456  |
| HMGA2    | ENSG00000149948 | 3812.659512 |
| FGFR1    | ENSG00000077782 | 853.3531286 |
| IL11     | ENSG00000095752 | 24.14517382 |
| PLCXD2   | ENSG00000240891 | 288.2203478 |
| ERRFI1   | ENSG00000116285 | 15337.11633 |
| FOXD1    | ENSG00000251493 | 356.3643771 |
| PHACTR3  | ENSG00000087495 | 729.3201835 |
| CYTH4    | ENSG00000100055 | 37.44419162 |
| EREG     | ENSG00000124882 | 3612.583599 |
| EVA1A    | ENSG00000115363 | 95.89933719 |
| GALNT9   | ENSG00000182870 | 111.9427417 |
| CXCL8    | ENSG00000169429 | 257.3687132 |
| CREB5    | ENSG00000146592 | 133.2013013 |
| LETM2    | ENSG00000165046 | 758.3268383 |
| PMEPA1   | ENSG00000124225 | 3097.239154 |
| SOCS2    | ENSG00000120833 | 153.2967765 |
| CD59     | ENSG00000085063 | 9289.458711 |
| IL7R     | ENSG00000168685 | 140.1606268 |
| SLC9A2   | ENSG00000115616 | 257.6700061 |
| SOCS3    | ENSG00000184557 | 457.4106279 |
| CLCF1    | ENSG00000175505 | 578.1229534 |
| HS3ST3A1 | ENSG00000153976 | 21.61119179 |
| FRMD6    | ENSG00000139926 | 595.7275783 |
| CCDC71L  | ENSG00000253276 | 1181.563717 |
| DUSP5    | ENSG00000138166 | 2927.227311 |
| EDN1     | ENSG00000078401 | 169.5985328 |
| FGFBP1   | ENSG00000137440 | 962.035448  |
| FHL2     | ENSG00000115641 | 6691.064738 |
| SDC4     | ENSG00000124145 | 8964.379106 |
| RASAL2   | ENSG00000075391 | 1146.685202 |
| DUSP7    | ENSG00000164086 | 1256.787312 |
| NOCT     | ENSG00000151014 | 140.090613  |
| SLC2A1   | ENSG00000117394 | 10677.96222 |
| SLC4A7   | ENSG00000033867 | 1429.76982  |
| DUSP4    | ENSG00000120875 | 1649.137925 |
| ARNTL2   | ENSG00000029153 | 5462.86694  |
| PLAU     | ENSG00000122861 | 6310.143716 |

|           |                 |             |
|-----------|-----------------|-------------|
| RTL1      | ENSG00000254656 | 7.851088271 |
| EPHA2     | ENSG00000142627 | 7741.151803 |
| GJB4      | ENSG00000189433 | 459.7381538 |
| ZNF697    | ENSG00000143067 | 619.2257757 |
| PMAIP1    | ENSG00000141682 | 1135.021358 |
| JAG1      | ENSG00000101384 | 6275.339758 |
| ODC1      | ENSG00000115758 | 7273.286623 |
| PHLDA2    | ENSG00000181649 | 2124.720434 |
| SOCS1     | ENSG00000185338 | 18.17782565 |
| PORCN     | ENSG00000102312 | 807.0421602 |
| ABL2      | ENSG00000143322 | 441.8146285 |
| AXL       | ENSG00000167601 | 856.814236  |
| IER3      | ENSG00000137331 | 3634.344904 |
| GRB10     | ENSG00000106070 | 1595.979352 |
| PAQR5     | ENSG00000137819 | 930.4050492 |
| ALOXE3    | ENSG00000179148 | 104.2438862 |
| SLC35F3   | ENSG00000183780 | 16.73303701 |
| WFDC3     | ENSG00000124116 | 91.16983131 |
| KIRREL    | ENSG00000183853 | 3035.229295 |
| ADAM19    | ENSG00000135074 | 4063.048529 |
| PRDM1     | ENSG00000057657 | 195.8879781 |
| PHLDA1    | ENSG00000139289 | 15131.17237 |
| MBOAT2    | ENSG00000143797 | 1894.929248 |
| ELL2      | ENSG00000118985 | 1461.66982  |
| ARSI      | ENSG00000183876 | 21.49706761 |
| TMC7      | ENSG00000170537 | 1037.223057 |
| DLC1      | ENSG00000164741 | 867.0103112 |
| TNFRSF10A | ENSG00000104689 | 533.5409884 |
| FLNA      | ENSG00000196924 | 34417.39455 |
| SERPINB9  | ENSG00000170542 | 807.8994739 |
| S100A16   | ENSG00000188643 | 6864.548404 |
| KRT6B     | ENSG00000185479 | 7.105228114 |
| NT5E      | ENSG00000135318 | 3558.108369 |
| MCL1      | ENSG00000143384 | 7276.588447 |
| FSTL3     | ENSG00000070404 | 1299.139823 |
| EGR1      | ENSG00000120738 | 2806.532747 |
| C3orf67   | ENSG00000163689 | 274.1214162 |
| MCC       | ENSG00000171444 | 999.2177142 |
| CTGF      | ENSG00000118523 | 749.5499904 |
| DENND2C   | ENSG00000175984 | 26.3556904  |
| SH2B3     | ENSG00000111252 | 634.2789241 |
| C8orf4    | ENSG00000176907 | 33.96716498 |
| PLEC      | ENSG00000178209 | 23892.03106 |
| CGB7      | ENSG00000196337 | 86.36653447 |

|          |                  |             |
|----------|------------------|-------------|
| LAMA3    | ENSG00000053747  | 6895.331961 |
| PEA15    | ENSG000000162734 | 1887.570907 |
| LDLR     | ENSG000000130164 | 5890.184265 |
| STC1     | ENSG000000159167 | 34.28671693 |
| ZNF185   | ENSG000000147394 | 2121.919882 |
| USP53    | ENSG000000145390 | 1894.111905 |
| C16orf52 | ENSG000000185716 | 824.934301  |
| PDGFB    | ENSG000000100311 | 255.5578185 |
| STRIP2   | ENSG000000128578 | 638.8919226 |
| BTBD19   | ENSG000000222009 | 59.33663038 |
| CYR61    | ENSG000000142871 | 341.9175762 |
| ZEB1     | ENSG000000148516 | 44.86957967 |
| KCNF1    | ENSG000000162975 | 23.75277968 |
| CAV1     | ENSG000000105974 | 834.1359264 |
| HRH1     | ENSG000000196639 | 1450.506495 |
| CAV2     | ENSG000000105971 | 1102.222368 |
| BHLHA15  | ENSG000000180535 | 44.09415436 |
| SLC25A32 | ENSG000000164933 | 1002.904643 |
| MICAL2   | ENSG000000133816 | 3164.984146 |
| NOG      | ENSG000000183691 | 9.671633758 |
| PTHLH    | ENSG000000087494 | 84.86964089 |
| LCP1     | ENSG000000136167 | 9.166054923 |
| MAGEB17  | ENSG000000182798 | 91.07192844 |
| PVR      | ENSG000000073008 | 3694.455646 |
| THBS1    | ENSG000000137801 | 1378.714728 |
| GPSM1    | ENSG000000160360 | 221.314844  |
| MFSD2A   | ENSG000000168389 | 119.9668075 |
| PPP1R15A | ENSG000000087074 | 1350.757077 |
| NAGS     | ENSG000000161653 | 336.111964  |
| RSC1A1   | ENSG000000215695 | 74.25648995 |
| DUSP1    | ENSG000000120129 | 472.7731644 |
| DNAH11   | ENSG000000105877 | 245.3293135 |
| LONRF3   | ENSG000000175556 | 443.7598555 |
| GJB2     | ENSG000000165474 | 1515.26844  |
| GPRC5A   | ENSG000000013588 | 26032.74086 |
| PRSS22   | ENSG000000005001 | 3161.597577 |
| MPO      | ENSG000000005381 | 6.669619999 |
| DNTTIP1  | ENSG000000101457 | 4933.092308 |
| ADAMTSL4 | ENSG000000143382 | 34.57168517 |
| PLK3     | ENSG000000173846 | 382.2972834 |
| PRDM8    | ENSG000000152784 | 331.0923332 |
| IGFN1    | ENSG000000163395 | 14.27786496 |
| SPTBN5   | ENSG000000137877 | 34.47057622 |
| B4GALT6  | ENSG000000118276 | 797.1896344 |

|           |                  |             |
|-----------|------------------|-------------|
| MAP1B     | ENSG000000131711 | 57.1632979  |
| EZR       | ENSG000000092820 | 16206.97279 |
| CDC42EP3  | ENSG000000163171 | 848.2133585 |
| ZYX       | ENSG000000159840 | 4097.848506 |
| RAI14     | ENSG000000039560 | 1058.100269 |
| AEN       | ENSG000000181026 | 1508.824281 |
| CEP170    | ENSG000000143702 | 688.9868095 |
| APBB2     | ENSG000000163697 | 1127.716552 |
| WNT7B     | ENSG000000188064 | 3273.101958 |
| HMGCS1    | ENSG000000112972 | 3531.92389  |
| ACTB      | ENSG000000075624 | 133560.2629 |
| IL33      | ENSG000000137033 | 15.0413393  |
| DUSP6     | ENSG000000139318 | 8552.176636 |
| WNT9A     | ENSG000000143816 | 25.8330322  |
| EMP1      | ENSG000000134531 | 4125.774091 |
| PAPPA     | ENSG000000182752 | 449.5093081 |
| HAS2      | ENSG000000170961 | 347.4276953 |
| PDLIM2    | ENSG000000120913 | 399.0836078 |
| SMIM10L2A | ENSG000000178947 | 134.1170153 |
| LYAR      | ENSG000000145220 | 907.29317   |
| NTSR1     | ENSG000000101188 | 4660.148416 |
| PRICKLE2  | ENSG000000163637 | 97.45251966 |
| PXN       | ENSG000000089159 | 12799.29026 |
| MSANTD3   | ENSG000000066697 | 348.7082916 |
| FERMT1    | ENSG000000101311 | 11452.21004 |
| KBTBD8    | ENSG000000163376 | 95.78608646 |
| KLF6      | ENSG000000067082 | 5208.490501 |
| TMEM154   | ENSG000000170006 | 1664.369139 |
| DUSP14    | ENSG000000276023 | 556.8022189 |
| HS3ST1    | ENSG000000002587 | 3973.654407 |
| RHOD      | ENSG000000173156 | 1375.946447 |
| LPAR1     | ENSG000000198121 | 30.9696916  |
| ST3GAL1   | ENSG000000008513 | 3608.333467 |
| CHAC1     | ENSG000000128965 | 655.0858818 |
| HS3ST3B1  | ENSG000000125430 | 78.77900079 |
| FLNB      | ENSG000000136068 | 24523.84044 |
| PIP4K2A   | ENSG000000150867 | 845.9302904 |
| ANXA5     | ENSG000000164111 | 3113.946223 |
| CSF2      | ENSG000000164400 | 47.56075732 |
| SAMD4A    | ENSG000000020577 | 1165.566813 |
| CGNL1     | ENSG000000128849 | 236.6632037 |
| ELK3      | ENSG000000111145 | 1547.808302 |
| RASA3     | ENSG000000185989 | 530.0525193 |
| SNX9      | ENSG000000130340 | 2007.114473 |

|            |                 |             |
|------------|-----------------|-------------|
| RGS20      | ENSG00000147509 | 12.33606467 |
| NPC1       | ENSG00000141458 | 2252.938954 |
| MAK16      | ENSG00000198042 | 528.9616688 |
| IL1A       | ENSG00000115008 | 50.70473925 |
| B3GNT5     | ENSG00000176597 | 2161.874277 |
| CCL20      | ENSG00000115009 | 311.3456663 |
| C3orf52    | ENSG00000114529 | 670.4656524 |
| LANCL3     | ENSG00000147036 | 74.07689285 |
| MYL9       | ENSG00000101335 | 16.07518664 |
| MYADM      | ENSG00000179820 | 1859.808163 |
| KLF14      | ENSG00000266265 | 15.07837532 |
| RBPMS2     | ENSG00000166831 | 13.84968398 |
| SH3TC1     | ENSG00000125089 | 494.4652487 |
| SQLE       | ENSG00000104549 | 1784.524839 |
| SHANK2     | ENSG00000162105 | 541.601705  |
| ENTPD7     | ENSG00000198018 | 156.5456248 |
| MYH15      | ENSG00000144821 | 213.4615438 |
| CCND1      | ENSG00000110092 | 10460.75234 |
| EFNB2      | ENSG00000125266 | 2008.367265 |
| PHC2       | ENSG00000134686 | 3686.630672 |
| MOSPD1     | ENSG00000101928 | 1471.14515  |
| SFN        | ENSG00000175793 | 2246.168744 |
| TRIB3      | ENSG00000101255 | 4003.426555 |
| RHOF       | ENSG00000139725 | 4632.015421 |
| PLK2       | ENSG00000145632 | 1801.648797 |
| SMOX       | ENSG00000088826 | 1559.666629 |
| SLC12A4    | ENSG00000124067 | 614.1227206 |
| HYI        | ENSG00000178922 | 260.9308096 |
| TNFRSF12A  | ENSG00000006327 | 6945.609868 |
| TRPV3      | ENSG00000167723 | 35.97272679 |
| NEK6       | ENSG00000119408 | 462.7404432 |
| ARHGAP40   | ENSG00000124143 | 16.60424145 |
| EHD4       | ENSG00000103966 | 2398.418437 |
| SERPINB8   | ENSG00000166401 | 1004.488475 |
| ZNF365     | ENSG00000138311 | 14.10094341 |
| TGM2       | ENSG00000198959 | 1491.298841 |
| UAP1       | ENSG00000117143 | 1069.131776 |
| DDX21      | ENSG00000165732 | 5677.916418 |
| NAMPT      | ENSG00000105835 | 7417.979811 |
| GREB1L     | ENSG00000141449 | 1583.668412 |
| SBDS       | ENSG00000126524 | 3454.616995 |
| OXTR       | ENSG00000180914 | 1932.366387 |
| CSGALNACT2 | ENSG00000169826 | 70.4388718  |
| AP1S2      | ENSG00000182287 | 1293.319896 |

|            |                  |             |
|------------|------------------|-------------|
| WWTR1      | ENSG00000018408  | 2015.946076 |
| CDCP1      | ENSG000000163814 | 6253.830403 |
| DDX60L     | ENSG000000181381 | 2294.950055 |
| FA2H       | ENSG000000103089 | 837.0205805 |
| EGFR       | ENSG000000146648 | 7262.565176 |
| IFRD1      | ENSG000000006652 | 652.7201168 |
| SLC20A1    | ENSG000000144136 | 5517.588924 |
| ELOVL1     | ENSG000000066322 | 6205.333869 |
| S100A14    | ENSG000000189334 | 6523.819674 |
| LIPG       | ENSG000000101670 | 685.0779669 |
| SEC14L2    | ENSG000000100003 | 1194.586326 |
| POLR3G     | ENSG000000113356 | 677.1099404 |
| CDC42EP2   | ENSG000000149798 | 1374.158128 |
| MAP1LC3B   | ENSG000000140941 | 2657.841017 |
| TRIM36     | ENSG000000152503 | 419.3551332 |
| YRDC       | ENSG000000196449 | 619.0527847 |
| LAT2       | ENSG000000086730 | 616.9518234 |
| KPNA4      | ENSG000000186432 | 3303.711966 |
| ACTG1      | ENSG000000184009 | 81951.49596 |
| ATG16L1    | ENSG000000085978 | 2846.625263 |
| P2RY2      | ENSG000000175591 | 1307.048356 |
| CORO1C     | ENSG000000110880 | 5200.842418 |
| P3H2       | ENSG000000090530 | 67.3041676  |
| TUBB2A     | ENSG000000137267 | 649.4162649 |
| ARHGEF2    | ENSG000000116584 | 1330.094396 |
| JUN        | ENSG000000177606 | 744.5962565 |
| NRG1       | ENSG000000157168 | 12.5098715  |
| PNO1       | ENSG000000115946 | 1199.995692 |
| C17orf51   | ENSG000000212719 | 132.720553  |
| DDIT4      | ENSG000000168209 | 1973.384035 |
| KCNK5      | ENSG000000164626 | 1157.241706 |
| KCTD5      | ENSG000000167977 | 2079.229232 |
| ZFP91-CNTF | ENSG000000255073 | 7.006222596 |
| KRT16      | ENSG000000186832 | 26.99475784 |
| BMP2K      | ENSG000000138756 | 673.7791603 |
| CTNNAL1    | ENSG000000119326 | 3206.840699 |
| PDE4B      | ENSG000000184588 | 127.519336  |
| MAPKBP1    | ENSG000000137802 | 696.4846718 |
| LYST       | ENSG000000143669 | 593.3486807 |
| HOMER2     | ENSG000000103942 | 315.2241263 |
| NIFK       | ENSG000000155438 | 2155.858637 |
| LRCH1      | ENSG000000136141 | 1022.101796 |
| KLF2       | ENSG000000127528 | 368.2654306 |
| PAK1IP1    | ENSG000000111845 | 871.1537465 |



|                |                  |             |
|----------------|------------------|-------------|
| ADAMTS16       | ENSG000000145536 | 59.7701634  |
| EIF5A2         | ENSG000000163577 | 375.5138152 |
| TNFRSF9        | ENSG000000049249 | 13.03465307 |
| MSANTD3-TMEFF1 | ENSG000000251349 | 15.12471073 |
| INHBA          | ENSG000000122641 | 18.16717654 |
| RABGEF1        | ENSG000000154710 | 1231.351061 |
| CFLAR          | ENSG000000003402 | 2712.663559 |
| ACSL4          | ENSG000000068366 | 1356.599601 |
| NPAS2          | ENSG000000170485 | 661.4128406 |
| ITCH           | ENSG000000283472 | 1066.088038 |
| TRMT6          | ENSG000000089195 | 1527.63702  |
| PROSER2        | ENSG000000148426 | 1100.178678 |
| TJP1           | ENSG000000104067 | 4330.778543 |
| SLC7A5         | ENSG000000103257 | 13822.42403 |
| ERCC1          | ENSG000000012061 | 1876.290285 |
| LHX5           | ENSG000000089116 | 6.392985482 |
| IL4R           | ENSG000000077238 | 2449.860629 |
| ASAP1          | ENSG000000153317 | 1754.870002 |
| CCNG2          | ENSG000000138764 | 1930.228001 |
| LIF            | ENSG000000128342 | 2189.43959  |
| SERINC5        | ENSG000000164300 | 3111.745094 |
| SGK2           | ENSG000000101049 | 853.6164766 |
| PHF21A         | ENSG000000135365 | 280.8881998 |
| FAM227A        | ENSG000000184949 | 32.08428218 |
| JAKMIP3        | ENSG000000188385 | 11.44921946 |
| LRRC6          | ENSG000000129295 | 79.22310808 |
| RAB3D          | ENSG000000105514 | 393.9075477 |
| GRAMD2         | ENSG000000175318 | 15.08588608 |
| PATL2          | ENSG000000229474 | 7.524476848 |
| OVOL2          | ENSG000000125850 | 67.75522445 |
| COQ8A          | ENSG000000163050 | 274.6952163 |
| FLT3LG         | ENSG000000090554 | 24.87384889 |
| LGR4           | ENSG000000205213 | 1423.777951 |
| PTPN6          | ENSG000000111679 | 473.5205144 |
| SOX12          | ENSG000000177732 | 331.7056126 |
| SGPP2          | ENSG000000163082 | 496.4117923 |
| MLLT3          | ENSG000000171843 | 240.9412028 |
| SEC31B         | ENSG000000075826 | 60.18439801 |
| ZFPM1          | ENSG000000179588 | 95.44217923 |
| PLCL1          | ENSG000000115896 | 6.211431355 |
| THAP8          | ENSG000000161277 | 31.05249321 |
| ANKRD9         | ENSG000000156381 | 826.0966315 |
| ADCY4          | ENSG000000129467 | 37.91935153 |
| FBXL20         | ENSG000000108306 | 205.4636819 |

|             |                  |             |
|-------------|------------------|-------------|
| GDPD1       | ENSG000000153982 | 28.96838631 |
| NAPSA       | ENSG000000131400 | 18.26471626 |
| SLC11A2     | ENSG000000110911 | 1548.069284 |
| SPHK2       | ENSG000000063176 | 587.6936886 |
| CDK19       | ENSG000000155111 | 269.9599784 |
| EPHB3       | ENSG000000182580 | 281.3963933 |
| SP5         | ENSG000000204335 | 38.06876306 |
| WDR31       | ENSG000000148225 | 62.86772272 |
| PDX1        | ENSG000000139515 | 111.1858337 |
| SLC2A10     | ENSG000000197496 | 390.9510163 |
| LRRC56      | ENSG000000161328 | 59.51552969 |
| CH507-9B2.1 | ENSG000000277117 | 160.4426057 |
| MLXIPL      | ENSG000000009950 | 199.7743181 |
| ACPP        | ENSG000000014257 | 7.447552767 |
| ARID5B      | ENSG000000150347 | 204.7271237 |
| C1orf21     | ENSG000000116667 | 33.61762527 |
| LRRC26      | ENSG000000184709 | 15.44689385 |
| ANK1        | ENSG000000029534 | 28.09187701 |
| GGT6        | ENSG000000167741 | 19.96278364 |
| ACCS        | ENSG000000110455 | 132.4055706 |
| ACBD4       | ENSG000000181513 | 206.3526472 |
| IFT74       | ENSG000000096872 | 90.04855426 |
| SPTLC3      | ENSG000000172296 | 70.0035204  |
| GOLPH3L     | ENSG000000143457 | 538.8374024 |
| LGR5        | ENSG000000139292 | 8.629157212 |
| STPG3       | ENSG000000197768 | 6.233384416 |
| NUDT6       | ENSG000000170917 | 54.5329536  |
| CEP162      | ENSG000000135315 | 77.65504982 |
| PTGER4      | ENSG000000171522 | 35.65769353 |
| SEMA4G      | ENSG000000095539 | 1767.910131 |
| LIN7B       | ENSG000000104863 | 41.83456046 |
| BRCA1       | ENSG000000012048 | 521.1085495 |
| PIP5K1B     | ENSG000000107242 | 389.2059555 |
| KCNH3       | ENSG000000135519 | 30.41971505 |
| FSBP        | ENSG000000265817 | 32.52780998 |
| PITX2       | ENSG000000164093 | 68.1597601  |
| SARM1       | ENSG000000004139 | 74.66331522 |
| TRIM38      | ENSG000000112343 | 592.4050109 |
| PPP1R32     | ENSG000000162148 | 13.62606865 |
| ORAI3       | ENSG000000175938 | 136.9965923 |
| HDHD3       | ENSG000000119431 | 923.6205588 |
| FOXD2       | ENSG000000186564 | 83.70509581 |
| SLFN13      | ENSG000000154760 | 690.2094395 |
| BEND7       | ENSG000000165626 | 10.28118097 |

|               |                 |             |
|---------------|-----------------|-------------|
| PXMP4         | ENSG00000101417 | 296.4269542 |
| BAHCC1        | ENSG00000266074 | 311.3156918 |
| HOXC4         | ENSG00000198353 | 137.0014039 |
| RPRM          | ENSG00000177519 | 22.79694953 |
| ORC1          | ENSG00000085840 | 273.5917814 |
| PRRT2         | ENSG00000167371 | 64.24454038 |
| FOXJ2         | ENSG00000065970 | 266.4552326 |
| MNS1          | ENSG00000138587 | 43.77686618 |
| CHST12        | ENSG00000136213 | 138.6986219 |
| SCX           | ENSG00000260428 | 47.03677245 |
| BBX           | ENSG00000114439 | 733.9232719 |
| TBX3          | ENSG00000135111 | 12.11499746 |
| SNAI3         | ENSG00000185669 | 37.02386044 |
| ANKRA2        | ENSG00000164331 | 227.3884068 |
| ARHGEF37      | ENSG00000183111 | 126.2934683 |
| USP28         | ENSG00000048028 | 331.9086652 |
| FAM229A       | ENSG00000225828 | 41.17902151 |
| GLS2          | ENSG00000135423 | 38.04273671 |
| FZD4          | ENSG00000174804 | 53.00945373 |
| PID1          | ENSG00000153823 | 57.9933645  |
| ZFP14         | ENSG00000142065 | 32.89927598 |
| RASSF9        | ENSG00000198774 | 51.10382535 |
| PLA2G6        | ENSG00000184381 | 92.18414084 |
| CABLES2       | ENSG00000149679 | 100.54562   |
| GRAMD1B       | ENSG00000023171 | 2939.580299 |
| ALAD          | ENSG00000148218 | 815.6380906 |
| TRIM68        | ENSG00000167333 | 147.3597602 |
| MSRB1         | ENSG00000198736 | 389.0821823 |
| CA3           | ENSG00000164879 | 11.72442745 |
| RASSF4        | ENSG00000107551 | 7.196241304 |
| GAL3ST1       | ENSG00000128242 | 275.8938573 |
| DPYSL2        | ENSG00000092964 | 493.8921445 |
| RP11-111M22.2 | ENSG00000179240 | 23.24159756 |
| KLHDC2        | ENSG00000165516 | 852.203291  |
| EBF4          | ENSG00000088881 | 10.64473595 |
| CARNS1        | ENSG00000172508 | 125.9064539 |
| SHROOM1       | ENSG00000164403 | 1104.291621 |
| SSBP3         | ENSG00000157216 | 362.054416  |
| TLR3          | ENSG00000164342 | 49.38475172 |
| ANG           | ENSG00000214274 | 86.0953223  |
| CREB3L1       | ENSG00000157613 | 911.5537601 |
| APOBEC3D      | ENSG00000243811 | 28.90082561 |
| BRIP1         | ENSG00000136492 | 203.0100577 |
| ZMYM3         | ENSG00000147130 | 654.768719  |

|           |                 |             |
|-----------|-----------------|-------------|
| MKRN2OS   | ENSG00000225526 | 53.99459562 |
| VNN1      | ENSG00000112299 | 248.2647269 |
| ZSWIM5    | ENSG00000162415 | 68.93932329 |
| BTN3A2    | ENSG00000186470 | 454.7534653 |
| ARRB1     | ENSG00000137486 | 500.5678384 |
| ZDHHC1    | ENSG00000159714 | 30.91855461 |
| AZIN2     | ENSG00000142920 | 19.41810547 |
| KLHL22    | ENSG00000099910 | 49.76031931 |
| SCAMP5    | ENSG00000198794 | 43.32996524 |
| ST5       | ENSG00000166444 | 297.8994043 |
| RAB40C    | ENSG00000197562 | 394.8337521 |
| MOB3B     | ENSG00000120162 | 48.39915954 |
| CITED1    | ENSG00000125931 | 193.5671225 |
| BTG2      | ENSG00000159388 | 91.04046337 |
| GRB7      | ENSG00000141738 | 557.1339364 |
| CREB3L4   | ENSG00000143578 | 272.7148787 |
| LRRC75B   | ENSG00000178026 | 161.7126326 |
| CCDC103   | ENSG00000167131 | 14.99612814 |
| WDR72     | ENSG00000166415 | 170.9885423 |
| AMY2B     | ENSG00000240038 | 15.38760009 |
| RORC      | ENSG00000143365 | 14.43595454 |
| TRANK1    | ENSG00000168016 | 339.1118628 |
| RAD54B    | ENSG00000283460 | 80.38109872 |
| MGAT3     | ENSG00000128268 | 259.5609523 |
| KHK       | ENSG00000138030 | 177.9343782 |
| PRRT1     | ENSG00000204314 | 31.55679479 |
| TTLL6     | ENSG00000170703 | 7.841468648 |
| TNFRSF11A | ENSG00000141655 | 145.5541491 |
| UNC5B     | ENSG00000107731 | 372.9039419 |
| PASK      | ENSG00000115687 | 281.0331862 |
| PLSCR4    | ENSG00000114698 | 50.57477991 |
| PIK3R3    | ENSG00000117461 | 246.5745598 |
| FMO5      | ENSG00000131781 | 49.71970801 |
| INSR      | ENSG00000171105 | 271.1904198 |
| RNFT2     | ENSG00000135119 | 42.4141651  |
| APOL2     | ENSG00000128335 | 1255.248442 |
| PTPN13    | ENSG00000163629 | 1432.428019 |
| BHLHE41   | ENSG00000123095 | 1986.188931 |
| PROCA1    | ENSG00000167525 | 55.30643623 |
| IGFLR1    | ENSG00000126246 | 24.01123679 |
| DOCK11    | ENSG00000147251 | 69.81380362 |
| PPP1R1B   | ENSG00000131771 | 319.672398  |
| TRIM34    | ENSG00000258659 | 190.0171848 |
| SLCO2B1   | ENSG00000137491 | 42.20185761 |

|          |                  |             |
|----------|------------------|-------------|
| DISP1    | ENSG000000154309 | 32.71626619 |
| TJP3     | ENSG000000105289 | 1682.813627 |
| C20orf96 | ENSG000000196476 | 167.6984847 |
| PTCH1    | ENSG000000185920 | 101.9192777 |
| GUCY2C   | ENSG000000070019 | 166.1788128 |
| PPFIBP2  | ENSG000000166387 | 390.0176703 |
| BBC3     | ENSG000000105327 | 219.1167931 |
| NMNAT3   | ENSG000000163864 | 58.08970524 |
| PLEKHH3  | ENSG000000068137 | 270.3353343 |
| NYNRIN   | ENSG000000205978 | 107.2222572 |
| IGSF9    | ENSG000000085552 | 304.6390224 |
| BTBD8    | ENSG000000189195 | 26.61939334 |
| HRCT1    | ENSG000000196196 | 48.59286746 |
| ABHD4    | ENSG000000100439 | 683.4966606 |
| CAPN5    | ENSG000000149260 | 2396.751486 |
| CROT     | ENSG000000005469 | 121.4810881 |
| DEPTOR   | ENSG000000155792 | 22.01620096 |
| HNF4G    | ENSG000000164749 | 594.0527543 |
| CAPN3    | ENSG000000092529 | 9.385174927 |
| CASZ1    | ENSG000000130940 | 289.3682912 |
| PIWIL2   | ENSG000000197181 | 8.25968078  |
| FOXN3    | ENSG000000053254 | 278.5396266 |
| TRIM31   | ENSG000000204616 | 3763.995009 |
| RARB     | ENSG000000077092 | 76.661419   |
| SLC7A2   | ENSG000000003989 | 99.95105496 |
| KIAA1683 | ENSG000000130518 | 69.15553347 |
| E2F8     | ENSG000000129173 | 155.6987862 |
| TOX3     | ENSG000000103460 | 257.3824292 |
| TSHZ2    | ENSG000000182463 | 14.70423904 |
| NOXO1    | ENSG000000196408 | 9.447223811 |
| ARHGEF40 | ENSG000000165801 | 122.1949689 |
| CDC25C   | ENSG000000158402 | 401.5264189 |
| CCDC183  | ENSG000000213213 | 74.26448703 |
| SEMA5A   | ENSG000000112902 | 276.5874016 |
| BTN2A2   | ENSG000000124508 | 59.93937991 |
| CNTNAP1  | ENSG000000108797 | 91.44861314 |
| SEC16B   | ENSG000000120341 | 24.39263711 |
| TESK2    | ENSG000000070759 | 42.54439169 |
| ZNF618   | ENSG000000157657 | 5.446962535 |
| SOWAHD   | ENSG000000187808 | 7.487047052 |
| C10orf10 | ENSG000000165507 | 23.41606959 |
| GPR19    | ENSG000000183150 | 14.78001964 |
| CAPS     | ENSG000000105519 | 53.60681587 |
| PRR15    | ENSG000000176532 | 1067.177256 |

|          |                 |             |
|----------|-----------------|-------------|
| YPEL3    | ENSG00000090238 | 331.4810341 |
| NEURL1B  | ENSG00000214357 | 15.79541681 |
| TTC30B   | ENSG00000196659 | 113.8372912 |
| LRRC45   | ENSG00000169683 | 359.5971649 |
| EXOC3L4  | ENSG00000205436 | 80.10157556 |
| ICOSLG   | ENSG00000160223 | 159.1941201 |
| PLCD1    | ENSG00000187091 | 92.99546282 |
| NR0B2    | ENSG00000131910 | 9.244185644 |
| ID3      | ENSG00000117318 | 2619.416619 |
| ARFGEF3  | ENSG00000112379 | 529.7157356 |
| SOX2     | ENSG00000181449 | 19.85611774 |
| MYLIP    | ENSG00000007944 | 174.5544958 |
| BCL2L14  | ENSG00000121380 | 175.247764  |
| HSD11B2  | ENSG00000176387 | 624.0536925 |
| PDZD3    | ENSG00000172367 | 140.5527899 |
| ABCB6    | ENSG00000115657 | 200.2374374 |
| PDK2     | ENSG00000005882 | 242.4350269 |
| RAB37    | ENSG00000172794 | 68.510462   |
| FAM214A  | ENSG00000047346 | 235.1366927 |
| C2orf15  | ENSG00000273045 | 87.46860411 |
| ENGASE   | ENSG00000167280 | 776.1611176 |
| HR       | ENSG00000168453 | 389.9178347 |
| ILDR1    | ENSG00000145103 | 138.0588167 |
| TSPAN12  | ENSG00000106025 | 14.63994863 |
| FAM117A  | ENSG00000121104 | 66.13338856 |
| FREM2    | ENSG00000150893 | 800.3938239 |
| NDRG2    | ENSG00000165795 | 102.8578529 |
| TRIM46   | ENSG00000163462 | 18.0131413  |
| GPRC5C   | ENSG00000170412 | 2140.878523 |
| KCNC4    | ENSG00000116396 | 781.8815256 |
| SLC2A12  | ENSG00000146411 | 291.3086648 |
| ZNF488   | ENSG00000265763 | 121.0530532 |
| CLRN3    | ENSG00000180745 | 345.6277051 |
| PEX5L    | ENSG00000114757 | 65.91454377 |
| PRICKLE4 | ENSG00000278224 | 21.26516002 |
| LCN12    | ENSG00000184925 | 46.11548837 |
| EXOC3L1  | ENSG00000179044 | 9.126466677 |
| C6orf222 | ENSG00000189325 | 140.7757985 |
| PPP1R3E  | ENSG00000235194 | 211.7505825 |
| RHOV     | ENSG00000104140 | 65.87005407 |
| CLDN3    | ENSG00000165215 | 651.3157918 |
| ST3GAL5  | ENSG00000115525 | 475.9072853 |
| HEXIM2   | ENSG00000168517 | 96.88855474 |
| EML1     | ENSG00000066629 | 29.73305324 |

|               |                  |             |
|---------------|------------------|-------------|
| PPM1H         | ENSG000000111110 | 34.25680883 |
| ALPK1         | ENSG000000073331 | 275.4964286 |
| TBC1D29       | ENSG000000266733 | 8.725404755 |
| ABCC6         | ENSG000000091262 | 179.1496836 |
| BCAS1         | ENSG000000064787 | 157.5355819 |
| GATSL2        | ENSG000000274070 | 22.75607292 |
| SSTR5         | ENSG000000162009 | 38.584264   |
| NSUN7         | ENSG000000179299 | 151.1379175 |
| DOC2A         | ENSG000000149927 | 225.5925501 |
| C2orf88       | ENSG000000187699 | 280.5311117 |
| SDPR          | ENSG000000168497 | 89.6720907  |
| CLEC2D        | ENSG000000069493 | 9.918111967 |
| ERBB2         | ENSG000000141736 | 2506.285615 |
| SOWAHB        | ENSG000000186212 | 117.0082435 |
| TRIM62        | ENSG000000116525 | 98.82958815 |
| ELF3          | ENSG000000163435 | 4538.920916 |
| SLC25A27      | ENSG000000153291 | 13.95913205 |
| HOXA13        | ENSG000000106031 | 11.20580557 |
| CTD-2132N18.2 | ENSG000000267221 | 28.18590992 |
| CHN2          | ENSG000000106069 | 95.02315051 |
| DUSP19        | ENSG000000162999 | 32.07700034 |
| RALGPS1       | ENSG000000136828 | 122.2571013 |
| C2orf81       | ENSG000000159239 | 15.67583007 |
| AQP7          | ENSG000000165269 | 40.4133497  |
| PLA2G4F       | ENSG000000168907 | 119.7633004 |
| KCNE3         | ENSG000000175538 | 480.1524718 |
| CHDH          | ENSG000000016391 | 49.44595981 |
| IRF1          | ENSG000000125347 | 965.3484939 |
| PDE5A         | ENSG000000138735 | 63.84175112 |
| KCNS3         | ENSG000000170745 | 783.4578133 |
| MAP3K8        | ENSG000000107968 | 32.63104193 |
| NFATC4        | ENSG000000100968 | 41.73649533 |
| MXD3          | ENSG000000213347 | 197.0872699 |
| SUOX          | ENSG000000139531 | 559.0814625 |
| FZD2          | ENSG000000180340 | 11.85520583 |
| ALDH3B2       | ENSG000000132746 | 29.16046989 |
| CYP24A1       | ENSG000000019186 | 5443.12781  |
| TRIM2         | ENSG000000109654 | 851.1226559 |
| RASA4         | ENSG000000105808 | 451.2031349 |
| KLC4          | ENSG000000137171 | 309.028255  |
| KCNMB4        | ENSG000000135643 | 136.9010401 |
| CBX7          | ENSG000000100307 | 160.3095243 |
| ZNF608        | ENSG000000168916 | 367.2608835 |
| LDLRAD1       | ENSG000000203985 | 72.61232291 |

|          |                  |             |
|----------|------------------|-------------|
| STAG3    | ENSG00000066923  | 82.2833682  |
| PLEKHG7  | ENSG000000187510 | 10.73810932 |
| BMF      | ENSG000000104081 | 99.91728143 |
| LNX1     | ENSG000000072201 | 37.67964566 |
| ANKS4B   | ENSG000000175311 | 402.8920976 |
| C21orf58 | ENSG000000160298 | 192.7083139 |
| CACNA1I  | ENSG000000100346 | 20.09599706 |
| PIK3IP1  | ENSG000000100100 | 99.05774959 |
| GBP4     | ENSG000000162654 | 81.07679353 |
| DEGS2    | ENSG000000168350 | 115.0047545 |
| KCNK10   | ENSG000000100433 | 9.608899503 |
| GLYCTK   | ENSG000000168237 | 919.7772908 |
| ERBB3    | ENSG000000065361 | 5378.559099 |
| APOL3    | ENSG000000128284 | 264.5944385 |
| FZD7     | ENSG000000155760 | 575.9544997 |
| TNFSF10  | ENSG000000121858 | 406.7155802 |
| DAPK1    | ENSG000000196730 | 781.4701946 |
| RHOU     | ENSG000000116574 | 555.2231212 |
| TP73     | ENSG000000078900 | 138.0867906 |
| FRAT2    | ENSG000000181274 | 273.1617933 |
| FFAR4    | ENSG000000186188 | 174.0344197 |
| PROC     | ENSG000000115718 | 67.98382283 |
| BCO1     | ENSG000000135697 | 37.5539518  |
| PPARGC1A | ENSG000000109819 | 149.9619836 |
| PKDCC    | ENSG000000162878 | 2641.850414 |
| KBTBD3   | ENSG000000182359 | 55.23943015 |
| LRRC31   | ENSG000000114248 | 201.0959121 |
| C5AR1    | ENSG000000197405 | 71.83312982 |
| GATS     | ENSG000000239521 | 133.9121644 |
| ATP10B   | ENSG000000118322 | 1628.779873 |
| PAQR8    | ENSG000000170915 | 242.1213395 |
| VIPR1    | ENSG000000114812 | 461.6316354 |
| C5orf56  | ENSG000000197536 | 90.80615189 |
| CLDN2    | ENSG000000165376 | 234.2487486 |
| GRHL3    | ENSG000000158055 | 221.2708392 |
| LMO4     | ENSG000000143013 | 1196.191842 |
| ICK      | ENSG000000112144 | 145.3802007 |
| SOWAHA   | ENSG000000198944 | 78.21828444 |
| IHH      | ENSG000000163501 | 70.80393156 |
| RTP4     | ENSG000000136514 | 186.3445743 |
| NCMAP    | ENSG000000184454 | 49.76729578 |
| GAS2     | ENSG000000148935 | 45.27039512 |
| ISX      | ENSG000000175329 | 534.4747833 |
| HOXC5    | ENSG000000172789 | 24.9719122  |



|           |                  |             |
|-----------|------------------|-------------|
| ACER2     | ENSG000000177076 | 165.27754   |
| SPDEF     | ENSG000000124664 | 123.3134376 |
| SMPD3     | ENSG000000103056 | 83.73718684 |
| CDX2      | ENSG000000165556 | 1907.780712 |
| MAP2K6    | ENSG000000108984 | 65.0916883  |
| MISP3     | ENSG000000141854 | 22.79634986 |
| HOXC6     | ENSG000000197757 | 198.3516719 |
| DAPK2     | ENSG000000035664 | 158.812956  |
| PALM3     | ENSG000000187867 | 17.87833648 |
| RAB26     | ENSG000000167964 | 37.3632844  |
| CDKN2C    | ENSG000000123080 | 44.47732431 |
| E2F2      | ENSG000000007968 | 151.5507942 |
| BTN3A1    | ENSG000000026950 | 335.4609845 |
| PRICKLE4  | ENSG000000124593 | 436.5899583 |
| PDE7B     | ENSG000000171408 | 27.59994335 |
| AGFG2     | ENSG000000106351 | 697.8575174 |
| INPP5J    | ENSG000000185133 | 41.37618067 |
| BTN3A3    | ENSG000000111801 | 190.2556901 |
| ZNF362    | ENSG000000160094 | 53.43160443 |
| MEF2C     | ENSG000000081189 | 304.3735939 |
| TLX1      | ENSG000000107807 | 34.40982645 |
| DMBX1     | ENSG000000197587 | 24.92774122 |
| PRR15L    | ENSG000000167183 | 585.3268037 |
| RAB40B    | ENSG000000141542 | 128.4781671 |
| SESN3     | ENSG000000149212 | 400.2749986 |
| YPEL2     | ENSG000000175155 | 70.28954384 |
| PDK4      | ENSG000000004799 | 147.0177739 |
| ADRA2A    | ENSG000000150594 | 27.84999568 |
| SLC40A1   | ENSG000000138449 | 813.0760682 |
| GNG2      | ENSG000000186469 | 138.6090335 |
| CYP1B1    | ENSG000000138061 | 42.30332468 |
| GNA14     | ENSG000000156049 | 11.90996735 |
| KIAA1211L | ENSG000000196872 | 126.1463918 |
| FRMPD3    | ENSG000000147234 | 29.68141814 |
| SAMD11    | ENSG000000187634 | 66.50403882 |
| NUAK2     | ENSG000000163545 | 133.6918041 |
| LRRC66    | ENSG000000188993 | 204.2644233 |
| CYP26B1   | ENSG000000003137 | 55.7819498  |
| C9orf152  | ENSG000000188959 | 33.56320943 |
| SLAIN1    | ENSG000000139737 | 30.60492599 |
| GRAMD1C   | ENSG000000178075 | 269.7605232 |
| C2orf72   | ENSG000000204128 | 98.65463679 |
| PBX1      | ENSG000000185630 | 169.7519472 |
| DBP       | ENSG000000105516 | 47.99590531 |

|         |                  |             |
|---------|------------------|-------------|
| ACSS1   | ENSG000000154930 | 236.6628752 |
| KLHDC7A | ENSG000000179023 | 48.74114706 |
| ASAP3   | ENSG000000088280 | 86.7590736  |
| EPN3    | ENSG000000049283 | 306.6832384 |
| FRY     | ENSG000000073910 | 30.96663461 |
| SYNM    | ENSG000000182253 | 31.01431547 |
| TMEM37  | ENSG000000171227 | 294.8711391 |
| ACACB   | ENSG000000076555 | 34.32954862 |
| VWA5B2  | ENSG000000145198 | 44.48293626 |
| CYP1A1  | ENSG000000140465 | 88.98951101 |
| FRAT1   | ENSG000000165879 | 64.90632562 |
| RASL11A | ENSG000000122035 | 601.7090523 |
| B4GAT1  | ENSG000000174684 | 251.8768559 |
| IKZF2   | ENSG000000030419 | 143.3034696 |
| PLCH1   | ENSG000000114805 | 466.1806432 |
| COLCA2  | ENSG000000214290 | 138.3116002 |
| RBBP8NL | ENSG000000130701 | 95.28430461 |

reated HPAF-II cells)

| log2FoldChange | pvalue    | padj      |
|----------------|-----------|-----------|
| 4.02771941     | 2.55E-44  | 2.23E-42  |
| 3.299231627    | 1.21E-156 | 8.21E-153 |
| 3.289778789    | 5.56E-23  | 1.39E-21  |
| 3.280832516    | 5.87E-24  | 1.58E-22  |
| 3.046019114    | 2.28E-37  | 1.38E-35  |
| 2.916213064    | 1.14E-54  | 1.61E-52  |
| 2.86543815     | 1.57E-197 | 2.14E-193 |
| 2.8065014      | 7.15E-28  | 2.56E-26  |
| 2.755852709    | 2.04E-30  | 8.53E-29  |
| 2.70806329     | 1.13E-105 | 1.28E-102 |
| 2.458530873    | 8.26E-46  | 8.03E-44  |
| 2.433709815    | 1.02E-34  | 5.33E-33  |
| 2.429118482    | 1.03E-65  | 2.69E-63  |
| 2.383384056    | 2.02E-36  | 1.15E-34  |
| 2.377383522    | 9.62E-62  | 2.08E-59  |
| 2.312983212    | 1.39E-145 | 6.33E-142 |
| 2.27958824     | 1.12E-76  | 4.22E-74  |
| 2.279055462    | 1.98E-102 | 1.80E-99  |
| 2.207871171    | 3.02E-42  | 2.30E-40  |
| 2.203203571    | 2.89E-19  | 5.30E-18  |
| 2.188201967    | 7.41E-13  | 7.79E-12  |
| 2.159955576    | 7.63E-43  | 6.18E-41  |
| 2.146154285    | 5.69E-14  | 6.69E-13  |
| 2.131968219    | 2.44E-16  | 3.57E-15  |
| 2.131115241    | 1.84E-31  | 8.24E-30  |
| 2.11892528     | 5.75E-26  | 1.77E-24  |
| 2.104131819    | 6.59E-92  | 4.98E-89  |
| 2.091806875    | 3.64E-55  | 5.21E-53  |
| 2.08706946     | 2.31E-38  | 1.48E-36  |
| 2.075988065    | 1.20E-66  | 3.26E-64  |
| 2.066054643    | 7.85E-43  | 6.32E-41  |
| 2.04696375     | 7.40E-145 | 2.52E-141 |
| 2.035555805    | 3.46E-75  | 1.18E-72  |
| 2.032251795    | 7.57E-09  | 5.00E-08  |
| 2.029691385    | 3.21E-101 | 2.73E-98  |
| 2.029184289    | 7.19E-67  | 2.04E-64  |
| 2.025550417    | 3.09E-48  | 3.34E-46  |
| 2.025265267    | 5.11E-134 | 9.94E-131 |
| 2.019896137    | 1.02E-42  | 8.17E-41  |
| 2.019720057    | 5.37E-23  | 1.35E-21  |
| 2.018142064    | 5.79E-57  | 9.16E-55  |

|             |           |           |
|-------------|-----------|-----------|
| 2.014330754 | 9.11E-100 | 7.29E-97  |
| 2.013210621 | 2.24E-119 | 3.39E-116 |
| 1.996670506 | 4.73E-15  | 6.14E-14  |
| 1.990007958 | 7.65E-67  | 2.13E-64  |
| 1.9814951   | 5.95E-16  | 8.31E-15  |
| 1.973751828 | 2.41E-39  | 1.61E-37  |
| 1.968883834 | 9.43E-117 | 1.28E-113 |
| 1.968142398 | 9.79E-33  | 4.57E-31  |
| 1.958892394 | 8.40E-09  | 5.52E-08  |
| 1.95225685  | 1.07E-09  | 7.89E-09  |
| 1.947135597 | 4.97E-10  | 3.84E-09  |
| 1.938450387 | 9.26E-19  | 1.65E-17  |
| 1.885449802 | 7.35E-18  | 1.21E-16  |
| 1.883766359 | 3.91E-36  | 2.22E-34  |
| 1.872828263 | 8.61E-89  | 5.33E-86  |
| 1.865869808 | 7.71E-92  | 5.53E-89  |
| 1.857769507 | 1.34E-24  | 3.72E-23  |
| 1.853563241 | 8.71E-20  | 1.67E-18  |
| 1.851735682 | 2.14E-08  | 1.34E-07  |
| 1.845042871 | 1.88E-51  | 2.30E-49  |
| 1.841594569 | 4.55E-23  | 1.15E-21  |
| 1.838300379 | 2.01E-87  | 1.14E-84  |
| 1.826820521 | 1.62E-30  | 6.87E-29  |
| 1.823846213 | 2.65E-13  | 2.91E-12  |
| 1.823642853 | 2.20E-89  | 1.43E-86  |
| 1.813760371 | 2.44E-24  | 6.71E-23  |
| 1.806583284 | 1.75E-50  | 2.05E-48  |
| 1.795206952 | 1.42E-10  | 1.17E-09  |
| 1.786778465 | 6.91E-08  | 4.02E-07  |
| 1.774713416 | 9.71E-86  | 5.29E-83  |
| 1.772347788 | 2.09E-120 | 3.56E-117 |
| 1.758641851 | 6.22E-10  | 4.73E-09  |
| 1.75478663  | 8.78E-82  | 3.73E-79  |
| 1.753292822 | 1.19E-13  | 1.36E-12  |
| 1.751565164 | 5.57E-135 | 1.26E-131 |
| 1.741503763 | 1.58E-63  | 3.71E-61  |
| 1.740300171 | 4.75E-42  | 3.55E-40  |
| 1.733115067 | 8.53E-28  | 3.04E-26  |
| 1.723162561 | 5.45E-09  | 3.66E-08  |
| 1.716194726 | 1.14E-58  | 2.12E-56  |
| 1.710380843 | 1.84E-110 | 2.27E-107 |
| 1.704987671 | 1.51E-49  | 1.70E-47  |
| 1.702061312 | 7.30E-74  | 2.37E-71  |
| 1.69895098  | 1.14E-104 | 1.19E-101 |

|             |           |           |
|-------------|-----------|-----------|
| 1.693268495 | 4.31E-28  | 1.57E-26  |
| 1.692514148 | 1.43E-57  | 2.38E-55  |
| 1.691123159 | 1.18E-78  | 4.59E-76  |
| 1.690745428 | 3.08E-28  | 1.14E-26  |
| 1.68103749  | 5.93E-138 | 1.62E-134 |
| 1.671774483 | 1.83E-88  | 1.08E-85  |
| 1.671563952 | 3.12E-59  | 6.16E-57  |
| 1.670770415 | 1.39E-102 | 1.35E-99  |
| 1.662874855 | 6.44E-72  | 1.99E-69  |
| 1.66171829  | 5.73E-07  | 2.92E-06  |
| 1.66105028  | 5.29E-34  | 2.65E-32  |
| 1.658617896 | 2.17E-76  | 7.78E-74  |
| 1.647529863 | 4.71E-45  | 4.28E-43  |
| 1.642494423 | 2.88E-39  | 1.90E-37  |
| 1.639013183 | 3.70E-09  | 2.54E-08  |
| 1.624401453 | 1.41E-19  | 2.67E-18  |
| 1.615586725 | 9.64E-18  | 1.57E-16  |
| 1.612438373 | 1.26E-17  | 2.03E-16  |
| 1.609412298 | 5.47E-20  | 1.07E-18  |
| 1.602474906 | 3.60E-20  | 7.19E-19  |
| 1.597727858 | 7.01E-59  | 1.34E-56  |
| 1.591574199 | 1.27E-17  | 2.03E-16  |
| 1.580808271 | 2.54E-18  | 4.38E-17  |
| 1.563390139 | 1.51E-75  | 5.27E-73  |
| 1.560842796 | 9.86E-21  | 2.04E-19  |
| 1.560501856 | 2.15E-29  | 8.36E-28  |
| 1.547528744 | 6.25E-35  | 3.31E-33  |
| 1.538951212 | 7.96E-44  | 6.73E-42  |
| 1.535697943 | 1.53E-06  | 7.26E-06  |
| 1.53302345  | 1.06E-45  | 1.01E-43  |
| 1.526833013 | 4.87E-43  | 4.00E-41  |
| 1.524944302 | 8.14E-20  | 1.56E-18  |
| 1.523723899 | 1.85E-19  | 3.47E-18  |
| 1.514884339 | 9.21E-38  | 5.73E-36  |
| 1.510750065 | 2.39E-64  | 5.81E-62  |
| 1.503523544 | 1.05E-83  | 4.76E-81  |
| 1.500390302 | 5.52E-65  | 1.39E-62  |
| 1.490150148 | 7.63E-53  | 1.01E-50  |
| 1.489909204 | 1.20E-18  | 2.12E-17  |
| 1.488429229 | 2.73E-85  | 1.38E-82  |
| 1.485210947 | 4.96E-42  | 3.69E-40  |
| 1.484854198 | 4.02E-58  | 7.10E-56  |
| 1.48362765  | 2.06E-69  | 6.11E-67  |
| 1.479398196 | 6.83E-20  | 1.32E-18  |

|             |            |            |
|-------------|------------|------------|
| 1.476536219 | 5.12E-05   | 0.00018951 |
| 1.47393096  | 1.26E-19   | 2.40E-18   |
| 1.472128414 | 3.00E-26   | 9.60E-25   |
| 1.471980764 | 5.75E-51   | 6.81E-49   |
| 1.467129216 | 2.46E-42   | 1.90E-40   |
| 1.463954095 | 1.25E-61   | 2.66E-59   |
| 1.462124384 | 3.43E-85   | 1.67E-82   |
| 1.45819697  | 1.39E-85   | 7.27E-83   |
| 1.45567465  | 1.95E-05   | 7.77E-05   |
| 1.453438958 | 1.72E-42   | 1.34E-40   |
| 1.449396519 | 5.15E-41   | 3.63E-39   |
| 1.447088427 | 7.22E-45   | 6.43E-43   |
| 1.443561698 | 1.78E-83   | 7.83E-81   |
| 1.441852251 | 1.83E-56   | 2.80E-54   |
| 1.44140293  | 4.47E-51   | 5.34E-49   |
| 1.440933004 | 2.72E-14   | 3.30E-13   |
| 1.436945924 | 1.75E-05   | 7.04E-05   |
| 1.428536236 | 3.98E-12   | 3.87E-11   |
| 1.420751331 | 5.83E-79   | 2.33E-76   |
| 1.412309949 | 1.15E-76   | 4.24E-74   |
| 1.412088715 | 2.11E-18   | 3.66E-17   |
| 1.407166699 | 1.34E-17   | 2.14E-16   |
| 1.403962839 | 4.04E-56   | 6.10E-54   |
| 1.401479577 | 5.05E-53   | 6.81E-51   |
| 1.397306425 | 1.03E-05   | 4.30E-05   |
| 1.388790263 | 1.24E-62   | 2.76E-60   |
| 1.38655977  | 9.11E-36   | 5.04E-34   |
| 1.385315027 | 1.56E-33   | 7.46E-32   |
| 1.377074793 | 1.52E-62   | 3.34E-60   |
| 1.373352606 | 1.32E-36   | 7.63E-35   |
| 1.37331585  | 7.10E-81   | 2.93E-78   |
| 1.367178307 | 0.00018039 | 0.00060016 |
| 1.360902432 | 5.38E-58   | 9.39E-56   |
| 1.359863544 | 8.12E-55   | 1.15E-52   |
| 1.35579167  | 1.73E-43   | 1.44E-41   |
| 1.352848683 | 4.54E-56   | 6.71E-54   |
| 1.352502056 | 2.36E-28   | 8.76E-27   |
| 1.348721709 | 6.41E-57   | 1.00E-54   |
| 1.34851504  | 5.08E-26   | 1.58E-24   |
| 1.348369709 | 9.47E-06   | 3.96E-05   |
| 1.347792064 | 2.33E-51   | 2.81E-49   |
| 1.339320466 | 4.42E-06   | 1.95E-05   |
| 1.33887163  | 2.10E-60   | 4.33E-58   |
| 1.337179383 | 1.67E-11   | 1.52E-10   |

|             |            |            |
|-------------|------------|------------|
| 1.33457192  | 5.23E-91   | 3.56E-88   |
| 1.331914979 | 5.73E-84   | 2.69E-81   |
| 1.329431543 | 1.55E-52   | 1.99E-50   |
| 1.329166622 | 1.26E-06   | 6.06E-06   |
| 1.321428119 | 4.28E-46   | 4.22E-44   |
| 1.321291006 | 4.15E-41   | 2.96E-39   |
| 1.311948891 | 3.97E-41   | 2.84E-39   |
| 1.305086038 | 7.46E-21   | 1.56E-19   |
| 1.303871877 | 4.53E-30   | 1.86E-28   |
| 1.303098164 | 5.16E-09   | 3.48E-08   |
| 1.296818843 | 5.67E-16   | 7.96E-15   |
| 1.296486234 | 1.67E-07   | 9.18E-07   |
| 1.295928976 | 3.50E-05   | 0.00013359 |
| 1.286656487 | 3.44E-28   | 1.26E-26   |
| 1.284467518 | 4.28E-45   | 3.91E-43   |
| 1.283490626 | 4.33E-29   | 1.67E-27   |
| 1.283068588 | 4.81E-07   | 2.48E-06   |
| 1.279751764 | 4.28E-37   | 2.54E-35   |
| 1.272546885 | 3.18E-57   | 5.15E-55   |
| 1.270887187 | 0.00049853 | 0.0015185  |
| 1.268273916 | 2.95E-09   | 2.05E-08   |
| 1.266464051 | 0.00050887 | 0.00154499 |
| 1.265715256 | 5.83E-11   | 4.97E-10   |
| 1.263953868 | 8.69E-58   | 1.48E-55   |
| 1.26229169  | 2.53E-30   | 1.05E-28   |
| 1.25807023  | 1.22E-17   | 1.97E-16   |
| 1.256239662 | 3.31E-11   | 2.91E-10   |
| 1.255552795 | 4.22E-33   | 1.99E-31   |
| 1.254492904 | 2.40E-18   | 4.14E-17   |
| 1.252688401 | 1.32E-07   | 7.35E-07   |
| 1.250935273 | 5.70E-25   | 1.63E-23   |
| 1.248466939 | 8.78E-21   | 1.82E-19   |
| 1.247777721 | 1.88E-33   | 8.97E-32   |
| 1.245238295 | 1.14E-34   | 5.96E-33   |
| 1.245206272 | 1.21E-58   | 2.22E-56   |
| 1.243548196 | 6.42E-48   | 6.83E-46   |
| 1.240887066 | 0.00065044 | 0.00192836 |
| 1.240563543 | 1.30E-47   | 1.36E-45   |
| 1.239848021 | 1.53E-05   | 6.18E-05   |
| 1.235979536 | 1.04E-23   | 2.73E-22   |
| 1.235712777 | 1.33E-22   | 3.22E-21   |
| 1.232282266 | 0.00045876 | 0.0014076  |
| 1.228613317 | 6.68E-06   | 2.86E-05   |
| 1.227204377 | 4.42E-35   | 2.37E-33   |

|             |            |            |
|-------------|------------|------------|
| 1.225795274 | 1.62E-06   | 7.65E-06   |
| 1.223587073 | 1.93E-50   | 2.25E-48   |
| 1.222074404 | 2.05E-39   | 1.38E-37   |
| 1.222071374 | 1.55E-51   | 1.92E-49   |
| 1.215696237 | 1.62E-34   | 8.34E-33   |
| 1.213676569 | 2.18E-65   | 5.60E-63   |
| 1.212343041 | 4.05E-43   | 3.34E-41   |
| 1.211968015 | 2.67E-49   | 2.96E-47   |
| 1.211681136 | 2.43E-49   | 2.71E-47   |
| 1.210306754 | 1.05E-52   | 1.36E-50   |
| 1.20847629  | 1.17E-57   | 1.96E-55   |
| 1.2057431   | 0.00060241 | 0.00180128 |
| 1.20432585  | 2.86E-48   | 3.12E-46   |
| 1.204203284 | 8.90E-05   | 0.00031559 |
| 1.204147656 | 1.13E-45   | 1.08E-43   |
| 1.203512813 | 1.38E-19   | 2.61E-18   |
| 1.200468027 | 8.91E-27   | 2.97E-25   |
| 1.198094477 | 8.12E-21   | 1.69E-19   |
| 1.19539285  | 7.81E-09   | 5.15E-08   |
| 1.188302735 | 1.85E-46   | 1.85E-44   |
| 1.188054728 | 4.33E-56   | 6.48E-54   |
| 1.186124671 | 5.06E-09   | 3.42E-08   |
| 1.184197556 | 2.06E-64   | 5.10E-62   |
| 1.183886186 | 1.01E-24   | 2.83E-23   |
| 1.18332591  | 4.60E-75   | 1.53E-72   |
| 1.182242501 | 3.37E-09   | 2.33E-08   |
| 1.182062349 | 4.18E-44   | 3.55E-42   |
| 1.175895732 | 1.24E-42   | 9.77E-41   |
| 1.175344308 | 4.45E-27   | 1.53E-25   |
| 1.173371536 | 1.44E-49   | 1.64E-47   |
| 1.172715851 | 8.72E-42   | 6.45E-40   |
| 1.171314961 | 4.73E-05   | 0.0001765  |
| 1.169272325 | 2.34E-72   | 7.42E-70   |
| 1.165963881 | 6.04E-18   | 1.00E-16   |
| 1.165239866 | 5.19E-09   | 3.50E-08   |
| 1.164332071 | 4.71E-46   | 4.61E-44   |
| 1.1623793   | 1.44E-29   | 5.66E-28   |
| 1.162135478 | 1.75E-66   | 4.66E-64   |
| 1.160371564 | 3.41E-06   | 1.54E-05   |
| 1.156221495 | 2.05E-52   | 2.59E-50   |
| 1.151592829 | 9.38E-15   | 1.19E-13   |
| 1.151355999 | 3.06E-44   | 2.65E-42   |
| 1.148338247 | 1.07E-27   | 3.79E-26   |
| 1.148314664 | 4.44E-35   | 2.37E-33   |



|             |            |            |
|-------------|------------|------------|
| 1.144820557 | 0.0010832  | 0.00305378 |
| 1.141246622 | 1.42E-59   | 2.83E-57   |
| 1.140687538 | 4.64E-34   | 2.34E-32   |
| 1.139512892 | 2.81E-06   | 1.29E-05   |
| 1.134846472 | 9.58E-28   | 3.40E-26   |
| 1.134395347 | 3.24E-13   | 3.53E-12   |
| 1.132503867 | 2.30E-37   | 1.39E-35   |
| 1.131563023 | 2.94E-08   | 1.80E-07   |
| 1.130743217 | 0.00080348 | 0.00233083 |
| 1.126142349 | 2.71E-29   | 1.05E-27   |
| 1.124812249 | 0.00087371 | 0.00250732 |
| 1.124004986 | 0.00115863 | 0.00324892 |
| 1.123758395 | 7.09E-25   | 2.02E-23   |
| 1.120135036 | 3.43E-57   | 5.49E-55   |
| 1.119856821 | 4.62E-29   | 1.77E-27   |
| 1.119467354 | 6.25E-13   | 6.63E-12   |
| 1.116493684 | 9.44E-15   | 1.20E-13   |
| 1.113321257 | 5.67E-58   | 9.78E-56   |
| 1.112327896 | 2.69E-57   | 4.41E-55   |
| 1.111412754 | 9.12E-70   | 2.76E-67   |
| 1.111118669 | 2.59E-28   | 9.59E-27   |
| 1.110630945 | 1.04E-42   | 8.25E-41   |
| 1.107870318 | 1.93E-12   | 1.94E-11   |
| 1.107410544 | 3.98E-39   | 2.62E-37   |
| 1.104905665 | 2.75E-37   | 1.64E-35   |
| 1.10407426  | 1.93E-45   | 1.81E-43   |
| 1.103438977 | 6.50E-22   | 1.48E-20   |
| 1.10117233  | 1.17E-16   | 1.75E-15   |
| 1.100664251 | 3.00E-58   | 5.44E-56   |
| 1.098753739 | 0.00014121 | 0.00048182 |
| 1.098623898 | 5.97E-27   | 2.03E-25   |
| 1.096350643 | 0.00091641 | 0.00261772 |
| 1.096283268 | 6.59E-56   | 9.65E-54   |
| 1.095297023 | 8.67E-37   | 5.08E-35   |
| 1.093650431 | 0.00206441 | 0.00549459 |
| 1.092642859 | 1.04E-09   | 7.64E-09   |
| 1.092469014 | 4.81E-39   | 3.15E-37   |
| 1.0919704   | 5.63E-63   | 1.28E-60   |
| 1.091165954 | 1.62E-37   | 9.91E-36   |
| 1.090074227 | 3.34E-40   | 2.29E-38   |
| 1.088874595 | 1.02E-58   | 1.92E-56   |
| 1.088628051 | 4.83E-41   | 3.42E-39   |
| 1.085021534 | 3.14E-07   | 1.66E-06   |
| 1.084462477 | 4.92E-23   | 1.24E-21   |

|             |            |            |
|-------------|------------|------------|
| 1.082937981 | 6.42E-48   | 6.83E-46   |
| 1.081279611 | 3.56E-61   | 7.47E-59   |
| 1.079874882 | 9.04E-36   | 5.02E-34   |
| 1.078044385 | 1.08E-31   | 4.83E-30   |
| 1.077507826 | 1.99E-63   | 4.59E-61   |
| 1.075413583 | 3.26E-23   | 8.32E-22   |
| 1.074974649 | 1.13E-46   | 1.14E-44   |
| 1.074251876 | 8.12E-53   | 1.06E-50   |
| 1.072690915 | 2.92E-46   | 2.90E-44   |
| 1.071001002 | 2.54E-27   | 8.88E-26   |
| 1.070617294 | 5.84E-39   | 3.80E-37   |
| 1.06815309  | 2.57E-18   | 4.41E-17   |
| 1.06760934  | 8.91E-25   | 2.52E-23   |
| 1.064529855 | 6.88E-30   | 2.78E-28   |
| 1.063705759 | 5.67E-20   | 1.10E-18   |
| 1.060967366 | 3.03E-30   | 1.25E-28   |
| 1.060014103 | 9.95E-29   | 3.74E-27   |
| 1.055537102 | 3.19E-37   | 1.90E-35   |
| 1.054184595 | 2.41E-11   | 2.15E-10   |
| 1.052979256 | 7.66E-54   | 1.06E-51   |
| 1.049648692 | 1.71E-26   | 5.58E-25   |
| 1.047454212 | 1.39E-49   | 1.59E-47   |
| 1.045428884 | 2.88E-06   | 1.31E-05   |
| 1.041724471 | 4.17E-23   | 1.06E-21   |
| 1.041296312 | 6.40E-34   | 3.16E-32   |
| 1.040668483 | 1.05E-33   | 5.09E-32   |
| 1.040545647 | 0.00282954 | 0.0072902  |
| 1.040446272 | 8.96E-40   | 6.04E-38   |
| 1.040141851 | 5.32E-08   | 3.16E-07   |
| 1.036820949 | 5.18E-08   | 3.08E-07   |
| 1.034173746 | 7.75E-21   | 1.62E-19   |
| 1.032954386 | 1.02E-48   | 1.12E-46   |
| 1.032908802 | 0.00341222 | 0.00863348 |
| 1.032143367 | 0.00063622 | 0.00189115 |
| 1.03177058  | 1.77E-17   | 2.81E-16   |
| 1.029971506 | 1.07E-56   | 1.66E-54   |
| 1.02916338  | 3.80E-09   | 2.60E-08   |
| 1.028550396 | 6.79E-18   | 1.12E-16   |
| 1.023464027 | 8.44E-19   | 1.52E-17   |
| 1.022536187 | 1.40E-17   | 2.23E-16   |
| 1.021518386 | 4.70E-47   | 4.85E-45   |
| 1.020841399 | 2.85E-33   | 1.35E-31   |
| 1.020822661 | 6.31E-16   | 8.81E-15   |
| 1.020797086 | 1.35E-34   | 7.02E-33   |

|              |            |            |
|--------------|------------|------------|
| 1.02043466   | 4.27E-06   | 1.89E-05   |
| 1.019631258  | 3.98E-18   | 6.75E-17   |
| 1.017778554  | 0.00367344 | 0.00922527 |
| 1.014328968  | 0.00245154 | 0.00641833 |
| 1.014318227  | 0.00200349 | 0.00533767 |
| 1.013588706  | 8.50E-40   | 5.75E-38   |
| 1.012759729  | 7.13E-41   | 5.00E-39   |
| 1.011817358  | 9.51E-26   | 2.91E-24   |
| 1.011196257  | 2.17E-23   | 5.58E-22   |
| 1.01116606   | 5.72E-31   | 2.47E-29   |
| 1.010001712  | 9.69E-34   | 4.71E-32   |
| 1.005943628  | 9.02E-30   | 3.63E-28   |
| 1.005483811  | 3.43E-32   | 1.56E-30   |
| 1.005086195  | 2.15E-40   | 1.48E-38   |
| 1.003449968  | 6.80E-34   | 3.33E-32   |
| 1.002945299  | 0.00593212 | 0.01421328 |
| 1.002763553  | 6.03E-45   | 5.44E-43   |
| 1.002237955  | 5.64E-47   | 5.77E-45   |
| 1.002216172  | 5.89E-08   | 3.47E-07   |
| 1.001156396  | 1.11E-41   | 8.12E-40   |
| -1.000061493 | 2.16E-31   | 9.59E-30   |
| -1.000247455 | 3.81E-26   | 1.21E-24   |
| -1.000345496 | 8.23E-16   | 1.13E-14   |
| -1.000384446 | 0.00039896 | 0.00123809 |
| -1.00088539  | 0.00446173 | 0.01098211 |
| -1.002023119 | 1.35E-06   | 6.47E-06   |
| -1.00295465  | 1.22E-21   | 2.72E-20   |
| -1.003086489 | 0.00348038 | 0.00878092 |
| -1.003103685 | 0.00600854 | 0.01437614 |
| -1.003426831 | 6.96E-06   | 2.96E-05   |
| -1.003600407 | 7.71E-14   | 8.97E-13   |
| -1.003654817 | 0.00101392 | 0.00287014 |
| -1.003985512 | 2.13E-26   | 6.86E-25   |
| -1.004077366 | 1.76E-20   | 3.57E-19   |
| -1.004365691 | 7.93E-12   | 7.46E-11   |
| -1.005853062 | 2.21E-21   | 4.83E-20   |
| -1.006751993 | 1.36E-13   | 1.54E-12   |
| -1.007670103 | 1.06E-05   | 4.41E-05   |
| -1.009049702 | 8.33E-08   | 4.80E-07   |
| -1.009380922 | 0.00559669 | 0.01350707 |
| -1.009823953 | 0.00031341 | 0.00099435 |
| -1.011305118 | 3.65E-27   | 1.25E-25   |
| -1.012449896 | 0.00022692 | 0.00074084 |
| -1.013621272 | 2.83E-11   | 2.51E-10   |

|              |            |            |
|--------------|------------|------------|
| -1.013886273 | 0.00043449 | 0.00134071 |
| -1.014417869 | 0.00183271 | 0.00493874 |
| -1.015798758 | 1.34E-38   | 8.63E-37   |
| -1.015987551 | 3.28E-25   | 9.57E-24   |
| -1.016066841 | 6.39E-16   | 8.89E-15   |
| -1.016435316 | 1.52E-11   | 1.39E-10   |
| -1.016873833 | 0.00025697 | 0.00083059 |
| -1.01748084  | 4.89E-06   | 2.14E-05   |
| -1.019225963 | 9.67E-09   | 6.29E-08   |
| -1.020269745 | 2.33E-22   | 5.56E-21   |
| -1.020952464 | 5.61E-06   | 2.43E-05   |
| -1.02192199  | 6.47E-12   | 6.15E-11   |
| -1.021992955 | 3.08E-09   | 2.14E-08   |
| -1.023049738 | 0.00501655 | 0.01222179 |
| -1.023621583 | 5.06E-11   | 4.35E-10   |
| -1.024716351 | 0.00040607 | 0.001259   |
| -1.025466894 | 0.00315984 | 0.00806034 |
| -1.025896495 | 0.00048239 | 0.00147479 |
| -1.026171593 | 0.00175108 | 0.0047394  |
| -1.026370709 | 1.05E-09   | 7.74E-09   |
| -1.027289484 | 9.49E-13   | 9.87E-12   |
| -1.027753033 | 8.86E-08   | 5.07E-07   |
| -1.028243909 | 1.08E-06   | 5.27E-06   |
| -1.02842131  | 1.93E-20   | 3.90E-19   |
| -1.029349342 | 0.00479346 | 0.01172021 |
| -1.029435366 | 0.00477478 | 0.01168294 |
| -1.029821215 | 8.30E-06   | 3.50E-05   |
| -1.031282396 | 3.16E-07   | 1.67E-06   |
| -1.031499939 | 0.00015031 | 0.00050902 |
| -1.033624387 | 4.00E-44   | 3.43E-42   |
| -1.034688286 | 5.02E-05   | 0.0001863  |
| -1.034727506 | 1.66E-21   | 3.67E-20   |
| -1.036789288 | 7.82E-13   | 8.20E-12   |
| -1.037984244 | 0.00033005 | 0.00104107 |
| -1.038071314 | 0.00046531 | 0.0014261  |
| -1.038219442 | 8.61E-06   | 3.62E-05   |
| -1.038791135 | 7.08E-07   | 3.54E-06   |
| -1.040556557 | 2.32E-25   | 6.88E-24   |
| -1.040838788 | 0.00262505 | 0.00682012 |
| -1.042058059 | 9.61E-11   | 8.01E-10   |
| -1.042623199 | 1.62E-22   | 3.92E-21   |
| -1.042774839 | 6.90E-08   | 4.02E-07   |
| -1.042883182 | 1.18E-20   | 2.44E-19   |
| -1.043152163 | 0.00394231 | 0.00983158 |

|              |            |            |
|--------------|------------|------------|
| -1.043206333 | 1.17E-18   | 2.07E-17   |
| -1.044342146 | 2.44E-17   | 3.84E-16   |
| -1.045411885 | 4.92E-10   | 3.80E-09   |
| -1.045639506 | 0.00082791 | 0.0023913  |
| -1.04567483  | 1.21E-13   | 1.39E-12   |
| -1.046308779 | 3.32E-05   | 0.00012741 |
| -1.046908093 | 4.19E-12   | 4.06E-11   |
| -1.047788046 | 3.59E-05   | 0.00013692 |
| -1.047919522 | 7.46E-10   | 5.59E-09   |
| -1.048007841 | 5.35E-05   | 0.00019764 |
| -1.048411288 | 1.77E-30   | 7.44E-29   |
| -1.0493371   | 0.00302542 | 0.00775671 |
| -1.050844675 | 0.00013798 | 0.00047173 |
| -1.051519643 | 4.72E-13   | 5.08E-12   |
| -1.053003251 | 8.03E-10   | 5.99E-09   |
| -1.057186221 | 4.78E-20   | 9.37E-19   |
| -1.057853779 | 7.65E-05   | 0.00027451 |
| -1.058646261 | 5.59E-05   | 0.00020571 |
| -1.058854029 | 3.00E-05   | 0.00011588 |
| -1.060390384 | 6.73E-06   | 2.87E-05   |
| -1.064819064 | 0.00030192 | 0.00096186 |
| -1.065136488 | 2.44E-05   | 9.59E-05   |
| -1.066232981 | 4.75E-08   | 2.83E-07   |
| -1.066589469 | 7.03E-09   | 4.66E-08   |
| -1.067428938 | 1.34E-08   | 8.60E-08   |
| -1.068061778 | 5.07E-36   | 2.88E-34   |
| -1.068106582 | 1.98E-11   | 1.78E-10   |
| -1.068224304 | 1.92E-22   | 4.60E-21   |
| -1.068727147 | 0.00250289 | 0.00653642 |
| -1.068759502 | 0.00338284 | 0.00856978 |
| -1.069891532 | 3.28E-15   | 4.31E-14   |
| -1.070788329 | 6.16E-17   | 9.42E-16   |
| -1.071831498 | 0.00054618 | 0.00164871 |
| -1.072899015 | 8.24E-24   | 2.18E-22   |
| -1.073263855 | 0.00276652 | 0.00714539 |
| -1.075659802 | 2.23E-08   | 1.39E-07   |
| -1.07656642  | 2.05E-20   | 4.13E-19   |
| -1.076581172 | 1.34E-20   | 2.75E-19   |
| -1.079123401 | 7.95E-06   | 3.36E-05   |
| -1.079778156 | 4.39E-08   | 2.62E-07   |
| -1.080404635 | 9.37E-22   | 2.11E-20   |
| -1.081675226 | 0.00021594 | 0.00070754 |
| -1.082178002 | 3.69E-15   | 4.83E-14   |
| -1.084599414 | 9.57E-26   | 2.92E-24   |

|              |            |            |
|--------------|------------|------------|
| -1.08486855  | 4.13E-06   | 1.84E-05   |
| -1.086382818 | 9.00E-15   | 1.15E-13   |
| -1.086492851 | 4.04E-06   | 1.80E-05   |
| -1.08680791  | 6.50E-22   | 1.48E-20   |
| -1.089187927 | 5.30E-24   | 1.43E-22   |
| -1.089777269 | 0.00012432 | 0.00042869 |
| -1.091285002 | 0.00075729 | 0.00220955 |
| -1.093246466 | 6.34E-06   | 2.72E-05   |
| -1.093786647 | 1.78E-05   | 7.14E-05   |
| -1.094198377 | 3.81E-17   | 5.89E-16   |
| -1.094913166 | 4.62E-20   | 9.10E-19   |
| -1.09527276  | 1.21E-05   | 4.98E-05   |
| -1.096538543 | 2.42E-13   | 2.68E-12   |
| -1.097070196 | 4.24E-07   | 2.20E-06   |
| -1.097213812 | 6.74E-05   | 0.00024416 |
| -1.098102238 | 4.87E-16   | 6.93E-15   |
| -1.099124666 | 2.37E-10   | 1.90E-09   |
| -1.099515801 | 0.00143099 | 0.00394443 |
| -1.099885435 | 2.29E-12   | 2.28E-11   |
| -1.100522053 | 0.00143008 | 0.00394272 |
| -1.10194736  | 0.00138623 | 0.00383035 |
| -1.103094458 | 1.16E-12   | 1.20E-11   |
| -1.104070726 | 0.00159748 | 0.00436096 |
| -1.104666224 | 9.52E-15   | 1.21E-13   |
| -1.105520984 | 4.27E-14   | 5.07E-13   |
| -1.10904997  | 7.28E-05   | 0.00026231 |
| -1.10979464  | 0.00236273 | 0.00620372 |
| -1.112503297 | 6.21E-11   | 5.29E-10   |
| -1.113905266 | 3.20E-16   | 4.65E-15   |
| -1.114433445 | 1.12E-15   | 1.52E-14   |
| -1.114449297 | 4.29E-06   | 1.90E-05   |
| -1.118640281 | 5.95E-13   | 6.34E-12   |
| -1.118810095 | 4.39E-06   | 1.94E-05   |
| -1.119723441 | 9.51E-16   | 1.30E-14   |
| -1.120547157 | 1.73E-05   | 6.94E-05   |
| -1.122182627 | 4.26E-47   | 4.43E-45   |
| -1.124552311 | 4.21E-26   | 1.33E-24   |
| -1.126584741 | 5.67E-53   | 7.56E-51   |
| -1.128954096 | 2.10E-06   | 9.79E-06   |
| -1.130715898 | 0.00018448 | 0.00061256 |
| -1.131577161 | 2.48E-06   | 1.14E-05   |
| -1.132336345 | 2.71E-22   | 6.43E-21   |
| -1.133804388 | 5.46E-14   | 6.45E-13   |
| -1.134298257 | 1.44E-05   | 5.86E-05   |

|              |            |            |
|--------------|------------|------------|
| -1.135829134 | 4.98E-05   | 0.0001849  |
| -1.136197741 | 1.30E-29   | 5.15E-28   |
| -1.136953909 | 1.26E-13   | 1.44E-12   |
| -1.138231461 | 1.37E-07   | 7.60E-07   |
| -1.139184052 | 1.77E-10   | 1.44E-09   |
| -1.141016568 | 3.00E-24   | 8.15E-23   |
| -1.141237129 | 4.71E-11   | 4.07E-10   |
| -1.146176192 | 3.00E-06   | 1.36E-05   |
| -1.148610341 | 4.03E-20   | 7.99E-19   |
| -1.1490637   | 4.04E-09   | 2.76E-08   |
| -1.151124843 | 1.51E-13   | 1.71E-12   |
| -1.151947849 | 0.00057645 | 0.00173127 |
| -1.152102431 | 2.47E-06   | 1.14E-05   |
| -1.153903627 | 1.47E-23   | 3.84E-22   |
| -1.15539404  | 2.23E-51   | 2.71E-49   |
| -1.156092147 | 2.20E-10   | 1.77E-09   |
| -1.157545917 | 0.00031163 | 0.00098987 |
| -1.157725343 | 4.86E-21   | 1.03E-19   |
| -1.158231632 | 0.00133423 | 0.00369791 |
| -1.160802644 | 6.69E-15   | 8.58E-14   |
| -1.160827391 | 0.00144572 | 0.00398098 |
| -1.163698614 | 1.06E-13   | 1.23E-12   |
| -1.164885409 | 8.80E-07   | 4.35E-06   |
| -1.166513583 | 9.22E-08   | 5.26E-07   |
| -1.168354516 | 2.15E-08   | 1.35E-07   |
| -1.174565156 | 8.64E-08   | 4.95E-07   |
| -1.178270078 | 4.64E-13   | 4.99E-12   |
| -1.179658306 | 1.79E-14   | 2.20E-13   |
| -1.179703732 | 0.00053048 | 0.00160632 |
| -1.18213876  | 0.00118515 | 0.00331647 |
| -1.182177102 | 7.89E-12   | 7.42E-11   |
| -1.184783673 | 4.54E-20   | 8.97E-19   |
| -1.184805397 | 1.34E-07   | 7.45E-07   |
| -1.185828468 | 1.28E-21   | 2.85E-20   |
| -1.188403193 | 1.44E-07   | 7.96E-07   |
| -1.189788434 | 1.49E-09   | 1.07E-08   |
| -1.190627747 | 0.00030181 | 0.00096179 |
| -1.195872591 | 6.74E-06   | 2.88E-05   |
| -1.196760099 | 0.00090668 | 0.0025921  |
| -1.19762713  | 0.0010333  | 0.00292095 |
| -1.198728031 | 0.00013438 | 0.00046024 |
| -1.200589038 | 0.00060398 | 0.00180557 |
| -1.204238221 | 4.21E-07   | 2.18E-06   |
| -1.205029526 | 2.97E-10   | 2.36E-09   |

|              |            |            |
|--------------|------------|------------|
| -1.206660064 | 7.52E-17   | 1.14E-15   |
| -1.210215073 | 0.00037148 | 0.00115967 |
| -1.210355959 | 2.63E-11   | 2.33E-10   |
| -1.210860469 | 1.14E-21   | 2.57E-20   |
| -1.213455117 | 5.10E-09   | 3.45E-08   |
| -1.214882282 | 1.45E-14   | 1.80E-13   |
| -1.215907201 | 3.73E-10   | 2.93E-09   |
| -1.216450301 | 0.00086397 | 0.00248249 |
| -1.21651247  | 1.78E-41   | 1.29E-39   |
| -1.218618771 | 1.86E-31   | 8.32E-30   |
| -1.218811142 | 0.000182   | 0.00060491 |
| -1.218985076 | 1.77E-13   | 1.99E-12   |
| -1.219238631 | 3.50E-13   | 3.80E-12   |
| -1.219292548 | 1.76E-26   | 5.75E-25   |
| -1.219554865 | 5.70E-10   | 4.36E-09   |
| -1.221349131 | 8.47E-19   | 1.52E-17   |
| -1.225571833 | 8.46E-19   | 1.52E-17   |
| -1.225761334 | 1.65E-08   | 1.04E-07   |
| -1.226235684 | 4.11E-15   | 5.36E-14   |
| -1.228044493 | 2.63E-10   | 2.10E-09   |
| -1.231238553 | 6.14E-34   | 3.04E-32   |
| -1.233035831 | 4.64E-20   | 9.12E-19   |
| -1.23334568  | 1.31E-13   | 1.49E-12   |
| -1.233499329 | 0.00039508 | 0.00122801 |
| -1.233569877 | 3.11E-07   | 1.65E-06   |
| -1.234751351 | 2.96E-32   | 1.36E-30   |
| -1.235104438 | 2.48E-11   | 2.21E-10   |
| -1.235801808 | 0.00031354 | 0.00099455 |
| -1.236408112 | 1.84E-36   | 1.05E-34   |
| -1.239704366 | 5.92E-35   | 3.15E-33   |
| -1.242813312 | 4.18E-05   | 0.00015776 |
| -1.242888493 | 6.28E-13   | 6.65E-12   |
| -1.244789724 | 4.23E-26   | 1.33E-24   |
| -1.246654918 | 6.43E-08   | 3.76E-07   |
| -1.246816489 | 0.00014433 | 0.00049075 |
| -1.247667351 | 3.92E-06   | 1.75E-05   |
| -1.249810632 | 0.00058064 | 0.00174277 |
| -1.254456283 | 0.00019825 | 0.00065445 |
| -1.25485779  | 2.66E-16   | 3.88E-15   |
| -1.255623728 | 2.50E-08   | 1.55E-07   |
| -1.256791044 | 1.38E-36   | 7.96E-35   |
| -1.256882424 | 2.01E-31   | 8.94E-30   |
| -1.257020347 | 5.59E-10   | 4.28E-09   |
| -1.257057854 | 2.20E-05   | 8.68E-05   |



|              |            |            |
|--------------|------------|------------|
| -1.258695077 | 1.07E-05   | 4.44E-05   |
| -1.260930148 | 6.37E-18   | 1.05E-16   |
| -1.261287967 | 0.00052267 | 0.00158372 |
| -1.263161377 | 2.24E-17   | 3.54E-16   |
| -1.264901359 | 1.26E-14   | 1.57E-13   |
| -1.26595115  | 5.03E-05   | 0.00018651 |
| -1.270876621 | 2.26E-06   | 1.05E-05   |
| -1.27220722  | 2.41E-15   | 3.20E-14   |
| -1.27352812  | 4.14E-18   | 6.98E-17   |
| -1.276485394 | 5.12E-06   | 2.24E-05   |
| -1.279288175 | 3.65E-09   | 2.51E-08   |
| -1.280805395 | 0.00037939 | 0.0011822  |
| -1.283928595 | 3.46E-45   | 3.20E-43   |
| -1.285400496 | 4.17E-12   | 4.05E-11   |
| -1.28604961  | 8.95E-12   | 8.36E-11   |
| -1.290668211 | 2.58E-11   | 2.30E-10   |
| -1.291068508 | 0.00028318 | 0.00090755 |
| -1.291152793 | 0.00034673 | 0.00109006 |
| -1.295132719 | 1.10E-05   | 4.57E-05   |
| -1.295749456 | 1.18E-09   | 8.58E-09   |
| -1.296606946 | 6.89E-06   | 2.94E-05   |
| -1.29864912  | 6.73E-10   | 5.09E-09   |
| -1.299656695 | 0.00013001 | 0.00044617 |
| -1.302300449 | 1.31E-06   | 6.32E-06   |
| -1.305572684 | 2.83E-11   | 2.51E-10   |
| -1.307657487 | 7.41E-05   | 0.00026667 |
| -1.310531684 | 8.60E-08   | 4.93E-07   |
| -1.311110634 | 1.01E-34   | 5.28E-33   |
| -1.311475449 | 3.26E-08   | 1.99E-07   |
| -1.325464484 | 2.07E-45   | 1.93E-43   |
| -1.325956514 | 9.89E-06   | 4.13E-05   |
| -1.326908956 | 2.49E-06   | 1.15E-05   |
| -1.332738271 | 5.16E-16   | 7.31E-15   |
| -1.335396927 | 2.34E-34   | 1.19E-32   |
| -1.338380501 | 0.00015969 | 0.00053772 |
| -1.338527772 | 8.35E-06   | 3.52E-05   |
| -1.341155983 | 4.21E-09   | 2.87E-08   |
| -1.343283944 | 1.61E-11   | 1.47E-10   |
| -1.348455186 | 6.49E-29   | 2.46E-27   |
| -1.359379479 | 1.63E-23   | 4.22E-22   |
| -1.360333922 | 2.66E-17   | 4.17E-16   |
| -1.362702311 | 4.97E-18   | 8.34E-17   |
| -1.363361263 | 3.02E-17   | 4.70E-16   |
| -1.368997569 | 7.03E-10   | 5.29E-09   |

|              |            |            |
|--------------|------------|------------|
| -1.374185581 | 3.03E-10   | 2.40E-09   |
| -1.381762494 | 0.00015182 | 0.00051357 |
| -1.383314577 | 0.00014425 | 0.00049059 |
| -1.387301135 | 1.42E-06   | 6.77E-06   |
| -1.387429884 | 6.21E-33   | 2.91E-31   |
| -1.39208825  | 2.10E-16   | 3.09E-15   |
| -1.394006311 | 1.73E-05   | 6.96E-05   |
| -1.400572757 | 2.00E-11   | 1.80E-10   |
| -1.402265441 | 1.41E-10   | 1.16E-09   |
| -1.402409759 | 2.67E-14   | 3.25E-13   |
| -1.404457082 | 0.00010142 | 0.0003555  |
| -1.408750359 | 7.79E-50   | 8.99E-48   |
| -1.414885194 | 3.46E-09   | 2.38E-08   |
| -1.428727661 | 5.57E-26   | 1.73E-24   |
| -1.432474078 | 3.33E-26   | 1.06E-24   |
| -1.443008114 | 2.18E-06   | 1.02E-05   |
| -1.445380872 | 2.72E-35   | 1.48E-33   |
| -1.447535727 | 4.91E-29   | 1.87E-27   |
| -1.448402631 | 9.76E-16   | 1.33E-14   |
| -1.45876427  | 6.97E-19   | 1.26E-17   |
| -1.461074673 | 7.44E-21   | 1.56E-19   |
| -1.461573615 | 1.12E-10   | 9.29E-10   |
| -1.462154401 | 7.61E-08   | 4.41E-07   |
| -1.46575488  | 1.38E-11   | 1.27E-10   |
| -1.475208821 | 3.84E-11   | 3.35E-10   |
| -1.475786489 | 3.67E-09   | 2.52E-08   |
| -1.483268826 | 2.14E-06   | 9.97E-06   |
| -1.489097064 | 1.59E-11   | 1.45E-10   |
| -1.491399857 | 6.07E-15   | 7.81E-14   |
| -1.492040487 | 7.03E-17   | 1.07E-15   |
| -1.49230336  | 2.68E-27   | 9.27E-26   |
| -1.498363559 | 1.04E-30   | 4.45E-29   |
| -1.501228267 | 1.08E-13   | 1.25E-12   |
| -1.501890729 | 2.71E-23   | 6.97E-22   |
| -1.508291194 | 2.76E-15   | 3.64E-14   |
| -1.508936325 | 2.25E-37   | 1.37E-35   |
| -1.512072797 | 8.72E-20   | 1.67E-18   |
| -1.512749447 | 3.37E-13   | 3.67E-12   |
| -1.520452906 | 1.79E-10   | 1.45E-09   |
| -1.524886858 | 1.12E-17   | 1.82E-16   |
| -1.542388984 | 8.72E-10   | 6.49E-09   |
| -1.5450674   | 1.21E-09   | 8.81E-09   |
| -1.553623332 | 1.41E-06   | 6.72E-06   |
| -1.565152316 | 1.11E-06   | 5.39E-06   |

|              |          |          |
|--------------|----------|----------|
| -1.571316422 | 1.30E-23 | 3.40E-22 |
| -1.573005624 | 1.44E-16 | 2.15E-15 |
| -1.576801379 | 1.04E-12 | 1.08E-11 |
| -1.580709004 | 1.17E-10 | 9.69E-10 |
| -1.581215729 | 6.07E-13 | 6.45E-12 |
| -1.58481335  | 1.28E-06 | 6.17E-06 |
| -1.591807687 | 3.48E-19 | 6.36E-18 |
| -1.595556984 | 1.27E-14 | 1.58E-13 |
| -1.612996738 | 2.00E-06 | 9.36E-06 |
| -1.614327174 | 5.96E-09 | 3.99E-08 |
| -1.623531106 | 2.26E-09 | 1.59E-08 |
| -1.628248832 | 1.78E-18 | 3.11E-17 |
| -1.628279658 | 1.62E-33 | 7.75E-32 |
| -1.634374155 | 2.45E-31 | 1.08E-29 |
| -1.639001288 | 8.87E-08 | 5.07E-07 |
| -1.644736093 | 4.77E-60 | 9.69E-58 |
| -1.645512955 | 4.25E-09 | 2.90E-08 |
| -1.647306376 | 8.10E-23 | 2.00E-21 |
| -1.650086193 | 8.41E-11 | 7.08E-10 |
| -1.651324951 | 8.17E-23 | 2.02E-21 |
| -1.674640643 | 3.51E-08 | 2.13E-07 |
| -1.683228734 | 7.38E-08 | 4.28E-07 |
| -1.695018545 | 3.09E-07 | 1.64E-06 |
| -1.696285168 | 4.22E-18 | 7.12E-17 |
| -1.702301354 | 1.50E-26 | 4.95E-25 |
| -1.705854608 | 8.61E-13 | 8.99E-12 |
| -1.707249325 | 5.68E-16 | 7.96E-15 |
| -1.707767465 | 2.91E-08 | 1.78E-07 |
| -1.708164355 | 1.63E-12 | 1.66E-11 |
| -1.713823006 | 2.76E-25 | 8.10E-24 |
| -1.71828461  | 1.13E-10 | 9.34E-10 |
| -1.721725336 | 1.58E-06 | 7.49E-06 |
| -1.725723989 | 4.76E-20 | 9.34E-19 |
| -1.726870842 | 1.27E-08 | 8.13E-08 |
| -1.72810983  | 8.49E-13 | 8.87E-12 |
| -1.732308716 | 1.79E-17 | 2.83E-16 |
| -1.733983799 | 9.32E-25 | 2.62E-23 |
| -1.741624511 | 1.06E-08 | 6.90E-08 |
| -1.766655109 | 7.54E-10 | 5.65E-09 |
| -1.793826324 | 2.26E-09 | 1.59E-08 |
| -1.832166147 | 1.25E-30 | 5.30E-29 |
| -1.888039763 | 1.21E-19 | 2.30E-18 |
| -1.902838761 | 1.03E-23 | 2.70E-22 |
| -1.918453604 | 2.88E-11 | 2.54E-10 |

|              |          |          |
|--------------|----------|----------|
| -1.941198357 | 9.87E-32 | 4.46E-30 |
| -1.947799877 | 3.95E-14 | 4.72E-13 |
| -1.959999105 | 6.18E-19 | 1.12E-17 |
| -1.967045761 | 3.81E-41 | 2.75E-39 |
| -1.974243162 | 1.06E-10 | 8.77E-10 |
| -1.974733862 | 2.22E-11 | 1.99E-10 |
| -2.017639557 | 1.01E-31 | 4.56E-30 |
| -2.039086819 | 3.77E-12 | 3.68E-11 |
| -2.067824888 | 3.94E-15 | 5.15E-14 |
| -2.095327498 | 6.88E-22 | 1.56E-20 |
| -2.146443546 | 1.56E-17 | 2.49E-16 |
| -2.152487163 | 1.35E-63 | 3.23E-61 |
| -2.222803598 | 9.20E-46 | 8.89E-44 |
| -2.251322764 | 1.17E-25 | 3.54E-24 |
| -2.268510493 | 3.33E-58 | 5.96E-56 |
| -2.380266094 | 2.03E-26 | 6.57E-25 |
| -2.82840585  | 1.44E-28 | 5.37E-27 |
