# Supplementary material for: HGF/MET Axis Induces Tumor Secretion of Tenascin-C and Promotes Stromal Rewiring in Pancreatic Cancer
Source: MDPI journal article supplement (doi:10.3390/cancers13143519), 2021-07-14
Supplement: s1 [file s1]

Suppl. Table S3: IPA analysis of differentially expressed genes (untreated vs HGF+Combo-treated HPAF-II cells)

| Categories               | Diseases or Functions Annotation          | p-Value  | Predicted Activation State | Activation z-score | Molecules        | # Molecules |
|--------------------------|-------------------------------------------|----------|----------------------------|--------------------|------------------|-------------|
| Cellular Movement        | Invasion of cells                         | 5.18E-14 | Decreased                  | -4,059             | ABL2,ADRB2,AKA   | 35          |
| Cellular Movement        | Cell movement                             | 8.44E-13 | Decreased                  | -3,080             | ABL2,ADRB2,AKA   | 53          |
| Cardiovascular System D  | Angiogenesis                              | 3.32E-11 | Decreased                  | -2,408             | ADRB2,BMP6,CD    | 31          |
| Cardiovascular System D  | Development of vasculature                | 3.66E-11 | Decreased                  | -2,408             | ABL2,ADRB2,ARII  | 33          |
| Cellular Movement        | Migration of cells                        | 4.02E-11 | Decreased                  | -3,240             | ABL2,ADRB2,AKA   | 47          |
| Cancer,Organismal Injury | Growth of tumor                           | 1.06E-10 | Decreased                  | -2,349             | BMP6,CD274,CGI   | 29          |
| Cellular Movement        | Cell movement of tumor cell lines         | 4.39E-10 | Decreased                  | -2,720             | ADRB2,AKAP12,B   | 30          |
| Cellular Movement        | Migration of tumor cell lines             | 3.21E-09 | Decreased                  | -3,511             | ADRB2,AKAP12,B   | 26          |
| Cardiovascular System D  | Vasculogenesis                            | 3.95E-09 | Decreased                  | -2,919             | BMP6,CXCL8,DKK   | 25          |
| Cancer,Organismal Injury | Progression of tumor                      | 1.07E-08 | Decreased                  | -2,236             | ABL2,CD274,CXCI  | 15          |
| Cardiovascular System D  | Cell movement of endothelial cells        | 3.43E-08 | Decreased                  | -2,090             | BMP6,CXCL8,DKK   | 16          |
| Cellular Movement        | Invasion of tumor cell lines              | 7.07E-08 | Decreased                  | -3,478             | ABL2,ADRB2,AKA   | 23          |
| Cancer,Organismal Injury | Invasion of tumor                         | 8.17E-08 | Decreased                  | -3,236             | CD274,CDX2,ETS   | 12          |
| Connective Tissue Disord | Damage of cartilage tissue                | 1.06E-07 | Decreased                  | -2,433             | CXCL8,DKK1,FGFF  | 8           |
| Cancer,Organismal Injury | Cancer of cells                           | 1.23E-07 | Decreased                  | -2,352             | ABL2,ADRB2,AKA   | 64          |
| Tissue Morphology        | Quantity of cells                         | 1.76E-07 | Decreased                  | -2,402             | ABL2,ADRB2,BCA   | 37          |
| Cancer,Organismal Injury | Epithelial neoplasm                       | 1.92E-07 | Decreased                  | -2,027             | ABL2,ACSS1,ADRI  | 114         |
| Cancer,Organismal Injury | Nonhematologic malignant neoplasm         | 2.31E-07 | Decreased                  | -3,038             | ABL2,ACSS1,ADRI  | 116         |
| Cardiovascular System D  | Migration of endothelial cells            | 4.40E-07 | Decreased                  | -2,103             | BMP6,CXCL8,DKK   | 14          |
| Cellular Movement        | Invasion of breast cancer cell lines      | 5.00E-07 | Decreased                  | -2,278             | ABL2,ADRB2,BCA   | 13          |
| Cellular Movement        | Migration of tumor cells                  | 5.04E-07 | Decreased                  | -2,767             | CXCL8,F3,ITGA5,F | 11          |
| Cancer,Organismal Injury | Invasion of malignant tumor               | 5.38E-07 | Decreased                  | -2,433             | CDX2,ETS1,F3,FEI | 9           |
| Cancer,Organismal Injury | Carcinoma                                 | 5.93E-07 | Decreased                  | -2,753             | ABL2,ACSS1,ADRI  | 113         |
| Cancer,Organismal Injury | Non-melanoma solid tumor                  | 7.18E-07 | Decreased                  | -2,303             | ABL2,ACSS1,ADRI  | 114         |
| Cancer,Organismal Injury | Metastasis of cells                       | 8.33E-07 | Decreased                  | -2,137             | CD274,CXCL8,F3,  | 13          |
| Cellular Movement        | Migration of cancer cells                 | 9.28E-07 | Decreased                  | -2,593             | CXCL8,F3,ITGA5,F | 10          |
| Cellular Movement        | Migration of breast cancer cell lines     | 1.82E-06 | Decreased                  | -2,635             | ADRB2,BCAR3,BN   | 12          |
| Cellular Movement        | Cell movement of breast cancer cell lines | 1.86E-06 | Decreased                  | -2,697             | ADRB2,BCAR3,BN   | 13          |
| Cell Death and Survival  | Cell survival                             | 4.79E-06 | Decreased                  | -2,921             | ABL2,BMP6,CXCL   | 30          |
| Inflammatory Response    | Inflammatory response                     | 5.72E-06 | Decreased                  | -3,102             | ADRB2,CLCF1,CXI  | 20          |
| Connective Tissue Disord | Abnormality of cartilage tissue           | 6.14E-06 | Decreased                  | -2,433             | ADRB2,CXCL8,DK   | 9           |
| Cellular Movement        | Cell movement of connective tissue cells  | 6.32E-06 | Decreased                  | -2,339             | ABL2,CXCL8,FGFF  | 10          |
| Cancer,Organismal Injury | Growth of carcinoma                       | 6.42E-06 | Decreased                  | -2,599             | BMP6,CD274,DKI   | 8           |

|                            |                                            |          |           |        |                  |    |
|----------------------------|--------------------------------------------|----------|-----------|--------|------------------|----|
| Connective Tissue Disord   | Deterioration of connective tissue         | 6.82E-06 | Decreased | -2,433 | ADRB2,CXCL8,DK   | 9  |
| Cancer,Organismal Injury   | Growth of malignant tumor                  | 9.06E-06 | Decreased | -2,804 | BMP6,CD274,CXC   | 14 |
| Cancer,Cellular Developr   | Proliferation of tumor cells               | 1.27E-05 | Decreased | -2,482 | CD274,CXCL8,DKI  | 14 |
| Tissue Development         | Growth of epithelial tissue                | 1.31E-05 | Decreased | -2,213 | BMP6,CXCL8,DKK   | 18 |
| Cellular Movement          | Cell movement of carcinoma cell lines      | 1.35E-05 | Decreased | -3,077 | CXCL8,ETS1,FERN  | 10 |
| Cancer,Cellular Moveme     | Invasion of tumor cells                    | 2.17E-05 | Decreased | -2,804 | CDX2,F3,FERMT2   | 8  |
| Cell-To-Cell Signaling and | Attachment of cells                        | 3.16E-05 | Decreased | -2,449 | ETS1,F3,FERMT2,  | 7  |
| Cell Death and Survival    | Cell viability                             | 3.81E-05 | Decreased | -2,506 | ABL2,BMP6,CXCL   | 27 |
| Hematological System Dε    | Accumulation of myeloid cells              | 3.82E-05 | Decreased | -2,187 | CXCL8,F3,FGFR1,I | 8  |
| Tissue Development         | Accumulation of cells                      | 4.02E-05 | Decreased | -2,060 | CD274,CXCL8,F3,  | 11 |
| Cardiovascular System Dε   | Vascularization                            | 5.24E-05 | Decreased | -2,110 | CGB3 (includes o | 9  |
| Cancer,Cell Death and Su   | Cell death of tumor                        | 6.43E-05 | Increased | 2,262  | BMP6,CXCL8,E2F   | 13 |
| Hematological System Dε    | Accumulation of phagocytes                 | 7.19E-05 | Decreased | -2,187 | CXCL8,F3,FGFR1,I | 7  |
| Cellular Assembly and Or   | Organization of cytoskeleton               | 1.06E-04 | Decreased | -3,013 | ABL2,AKAP12,B4I  | 26 |
| Cellular Growth and Prol   | Outgrowth of cells                         | 1.26E-04 | Decreased | -2,579 | BMP6,CD274,FGF   | 12 |
| Cancer,Organismal Injury   | Metastasis of tumor cell lines             | 1.44E-04 | Decreased | -2,121 | CD274,CXCL8,F3,  | 9  |
| Cellular Movement          | Migration of carcinoma cell lines          | 1.48E-04 | Decreased | -2,763 | CXCL8,ETS1,ITGA  | 8  |
| Cellular Growth and Prol   | Proliferation of epithelial cells          | 1.48E-04 | Decreased | -2,244 | BMP6,CXCL8,DKK   | 13 |
| Cellular Development,Ce    | Proliferation of muscle cells              | 1.50E-04 | Decreased | -2,028 | CXCL8,F3,ITGA5,( | 11 |
| Cellular Development,Ce    | Cell proliferation of carcinoma cell lines | 1.68E-04 | Decreased | -2,191 | DKK1,F3,FGFR1,F  | 12 |
| Cancer,Cell Death and Su   | Cell death of tumor cells                  | 2.01E-04 | Increased | 2,262  | BMP6,CXCL8,E2F   | 12 |
| Cancer,Cell Death and Su   | Apoptosis of tumor cells                   | 2.37E-04 | Increased | 2,361  | E2F2,ETS1,LAMA   | 9  |
| Cellular Development,Ce    | Outgrowth of neurites                      | 2.41E-04 | Decreased | -2,410 | BMP6,FGFR1,KLF   | 11 |
| Cellular Development,Ce    | Growth of neurites                         | 3.63E-04 | Decreased | -2,738 | BMP6,DCLK1,FGF   | 12 |
| Cellular Movement          | Invasion of carcinoma cell lines           | 3.90E-04 | Decreased | -2,768 | DKK1,FGFR1,FOSI  | 8  |
| Cellular Movement          | Cell movement of lung cancer cell lines    | 4.03E-04 | Decreased | -2,378 | ETS1,FOSL1,ITGA  | 6  |
| Nervous System Develop     | Quantity of neurons                        | 4.26E-04 | Decreased | -2,564 | ABL2,ADRB2,BCA   | 11 |
| Cell-To-Cell Signaling and | Recruitment of phagocytes                  | 4.99E-04 | Decreased | -2,043 | CD274,CXCL8,ETS  | 8  |
| Cell Morphology,Cellular   | Formation of cellular protrusions          | 6.41E-04 | Decreased | -2,883 | ABL2,AKAP12,B4I  | 18 |
| Lipid Metabolism,Small M   | Synthesis of lipid                         | 6.43E-04 | Decreased | -2,292 | ACSS1,ADRB2,ALI  | 16 |
| Hematological System Dε    | Quantity of macrophages                    | 7.01E-04 | Increased | 2,216  | F3,IL1RL1,PLAU,S | 7  |
