# Supplementary material for: HGF/MET Axis Induces Tumor Secretion of Tenascin-C and Promotes Stromal Rewiring in Pancreatic Cancer
Source: MDPI journal article supplement (doi:10.3390/cancers13143519), 2021-07-14
Supplement: s1 [file s1]

Suppl. Table S2: differentially expressed genes (untreated vs HGF+Co

| symbol    | ensembl gene ID | baseMean    | log2FoldChange |
|-----------|-----------------|-------------|----------------|
| PRR15L    | ENSG00000167183 | 418.4757737 | 1.609846214    |
| SLC40A1   | ENSG00000138449 | 692.9929291 | 1.510285231    |
| B4GAT1    | ENSG00000174684 | 172.7153046 | 1.489967926    |
| RBBP8NL   | ENSG00000130701 | 46.20802283 | 1.465435618    |
| PLCH1     | ENSG00000114805 | 284.9739725 | 1.357507902    |
| CLDN2     | ENSG00000165376 | 222.7719504 | 1.343076556    |
| IKZF2     | ENSG00000030419 | 92.95180959 | 1.340686848    |
| ISX       | ENSG00000175329 | 381.7710615 | 1.322238097    |
| C2orf72   | ENSG00000204128 | 77.22669135 | 1.304836985    |
| GRAMD1C   | ENSG00000178075 | 204.5508011 | 1.262202653    |
| TNFSF10   | ENSG00000121858 | 321.3831693 | 1.222519025    |
| C2orf88   | ENSG00000187699 | 261.6839322 | 1.209346602    |
| TMEM37    | ENSG00000171227 | 206.6429645 | 1.201988438    |
| COLCA2    | ENSG00000214290 | 72.50779605 | 1.188817194    |
| LRRC66    | ENSG00000188993 | 165.0579814 | 1.187006898    |
| EPN3      | ENSG00000049283 | 202.8595976 | 1.16969869     |
| TRIM2     | ENSG00000109654 | 750.3002229 | 1.166106984    |
| PDK4      | ENSG00000004799 | 114.5399158 | 1.1606563      |
| ACSS1     | ENSG00000154930 | 157.6750987 | 1.158336468    |
| E2F2      | ENSG00000007968 | 124.1403034 | 1.154408952    |
| RASL11A   | ENSG00000122035 | 353.3590716 | 1.149167848    |
| ATP10B    | ENSG00000118322 | 1335.06413  | 1.141889658    |
| LRRC31    | ENSG00000114248 | 144.7281745 | 1.136851724    |
| FFAR4     | ENSG00000186188 | 148.327134  | 1.116273255    |
| SMPD3     | ENSG00000103056 | 69.22783452 | 1.101473797    |
| MEF2C     | ENSG00000081189 | 234.2925565 | 1.099306644    |
| PKDCC     | ENSG00000162878 | 2001.592849 | 1.08350001     |
| RHOU      | ENSG00000116574 | 467.6288523 | 1.076489199    |
| PBX1      | ENSG00000185630 | 111.916253  | 1.066938383    |
| SESN3     | ENSG00000149212 | 294.6919034 | 1.060044064    |
| FRAT1     | ENSG00000165879 | 38.25809161 | 1.047500444    |
| AGFG2     | ENSG00000106351 | 518.7940356 | 1.046845872    |
| KCNE3     | ENSG00000175538 | 387.1241024 | 1.024600682    |
| KLHDC7A   | ENSG00000179023 | 32.65630176 | 1.022555174    |
| CDX2      | ENSG00000165556 | 1299.160212 | 1.021684129    |
| SOWAHA    | ENSG00000198944 | 64.13398424 | 1.020116523    |
| KIAA1211L | ENSG00000196872 | 91.16941998 | 1.017445783    |
| ICK       | ENSG00000112144 | 117.5429483 | 1.015434675    |
| GNG2      | ENSG00000186469 | 98.9326669  | 1.00711516     |
| RAB40B    | ENSG00000141542 | 92.47772673 | 1.002534406    |
| ARHGAP29  | ENSG00000137962 | 4159.892549 | -1.002822583   |

|           |                 |             |              |
|-----------|-----------------|-------------|--------------|
| DKK1      | ENSG00000107984 | 15171.63575 | -1.011703273 |
| F3        | ENSG00000117525 | 31391.37993 | -1.013352978 |
| ODC1      | ENSG00000115758 | 7886.172253 | -1.019574153 |
| RASAL2    | ENSG00000075391 | 1239.930027 | -1.022730174 |
| DUSP5     | ENSG00000138166 | 3220.617603 | -1.025652239 |
| LAMA3     | ENSG00000053747 | 7261.137201 | -1.027883169 |
| PLAU      | ENSG00000122861 | 6869.405856 | -1.031675613 |
| FRMD6     | ENSG00000139926 | 649.0781898 | -1.035148854 |
| MDFI      | ENSG00000112559 | 786.8246881 | -1.043050477 |
| ALOXE3    | ENSG00000179148 | 110.0364911 | -1.047621321 |
| MARCH_4   | ENSG00000144583 | 24.65835871 | -1.048651102 |
| PMEP A1   | ENSG00000124225 | 3442.608454 | -1.056240164 |
| BMP6      | ENSG00000153162 | 43.54475506 | -1.058199633 |
| TUBB6     | ENSG00000176014 | 1857.842864 | -1.059039621 |
| ABL2      | ENSG00000143322 | 466.2317344 | -1.062927245 |
| PIK3CD    | ENSG00000171608 | 31.62521589 | -1.072807478 |
| CXCL8     | ENSG00000169429 | 279.9904945 | -1.078501804 |
| TGM2      | ENSG00000198959 | 1480.780227 | -1.087322295 |
| IFFO2     | ENSG00000169991 | 1369.963584 | -1.087899588 |
| FGFBP1    | ENSG00000137440 | 1026.062419 | -1.099251229 |
| CLCF1     | ENSG00000175505 | 618.9560221 | -1.102696444 |
| SOCS2     | ENSG00000120833 | 164.4005854 | -1.104980413 |
| PHLDB2    | ENSG00000144824 | 316.5262511 | -1.114324071 |
| TGFA      | ENSG00000163235 | 5748.737574 | -1.115945462 |
| KIAA1462  | ENSG00000165757 | 133.7254999 | -1.127867544 |
| KLF7      | ENSG00000118263 | 775.3400907 | -1.130636938 |
| SLC9A2    | ENSG00000115616 | 274.0065523 | -1.131299364 |
| TMEM158   | ENSG00000249992 | 95.55676281 | -1.131565934 |
| CD274     | ENSG00000120217 | 227.7036227 | -1.146815887 |
| MMP1      | ENSG00000196611 | 9597.236413 | -1.154091446 |
| KRT17     | ENSG00000128422 | 21.85298551 | -1.165565047 |
| PORCN     | ENSG00000102312 | 832.5467692 | -1.201185754 |
| SPRR3     | ENSG00000163209 | 58.5121535  | -1.202413406 |
| GLIPR1    | ENSG00000139278 | 709.0685729 | -1.20463722  |
| LRRC8C    | ENSG00000171488 | 84.76807441 | -1.22192445  |
| CHST11    | ENSG00000171310 | 1267.059559 | -1.225054633 |
| BCAR3     | ENSG00000137936 | 1545.553546 | -1.230540749 |
| KIAA1549L | ENSG00000110427 | 552.9060622 | -1.237230945 |
| S100A2    | ENSG00000196754 | 167.1993957 | -1.242183953 |
| TM4SF19   | ENSG00000145107 | 148.4628072 | -1.245524108 |
| TNC       | ENSG00000041982 | 544.9848471 | -1.254286441 |
| KRTAP3-1  | ENSG00000212901 | 51.38081958 | -1.25445332  |
| SH2D5     | ENSG00000189410 | 158.0169734 | -1.285090456 |
| FGFR1     | ENSG00000077782 | 898.9278649 | -1.285699185 |

|          |                  |             |              |
|----------|------------------|-------------|--------------|
| GFOD1    | ENSG000000145990 | 458.8753928 | -1.300118377 |
| FAM83A   | ENSG000000147689 | 3221.860808 | -1.302088379 |
| MDGA1    | ENSG000000112139 | 202.6177554 | -1.307218897 |
| CGB8     | ENSG000000213030 | 64.59079669 | -1.309260446 |
| PTRF     | ENSG000000177469 | 615.2107113 | -1.313879566 |
| ZBED2    | ENSG000000177494 | 1708.815764 | -1.316655288 |
| ARID3B   | ENSG000000179361 | 374.1944238 | -1.318400584 |
| THBD     | ENSG000000178726 | 3147.182712 | -1.333220352 |
| OSBP2    | ENSG000000184792 | 502.7382456 | -1.333838615 |
| CPA4     | ENSG000000128510 | 238.4407832 | -1.334628538 |
| TMCC3    | ENSG000000057704 | 806.0921596 | -1.353079017 |
| WNT7A    | ENSG000000154764 | 93.33127697 | -1.367665959 |
| LAMB3    | ENSG000000196878 | 8738.385373 | -1.367917287 |
| FERMT2   | ENSG000000073712 | 186.7506369 | -1.375798866 |
| TBC1D2   | ENSG000000095383 | 824.8424885 | -1.399199262 |
| ITGA5    | ENSG000000161638 | 211.3608059 | -1.403808913 |
| NRIP3    | ENSG000000175352 | 149.8894582 | -1.488227949 |
| ADRB2    | ENSG000000169252 | 192.3265752 | -1.512332579 |
| LAMC2    | ENSG000000058085 | 19875.15748 | -1.513062265 |
| ETS1     | ENSG000000134954 | 4493.533137 | -1.518545097 |
| PEAR1    | ENSG000000187800 | 532.6728506 | -1.526505895 |
| SERPINE1 | ENSG000000106366 | 316.2975973 | -1.561329456 |
| SNAI2    | ENSG000000019549 | 774.6855218 | -1.56404429  |
| LOXL2    | ENSG000000134013 | 217.8836515 | -1.58321798  |
| SPOCD1   | ENSG000000134668 | 211.2222505 | -1.588378715 |
| MMP10    | ENSG000000166670 | 512.2692024 | -1.607883562 |
| UPP1     | ENSG000000183696 | 1410.991458 | -1.613911537 |
| TNFAIP3  | ENSG000000118503 | 444.4287567 | -1.64244534  |
| AKAP12   | ENSG000000131016 | 10402.08071 | -1.647588105 |
| DCLK1    | ENSG000000133083 | 94.23404246 | -1.678602789 |
| FOSL1    | ENSG000000175592 | 4016.00735  | -1.719778274 |
| NAV3     | ENSG000000067798 | 150.0459026 | -1.839973443 |
| RELN     | ENSG000000189056 | 125.5109664 | -1.941025512 |
| CGB5     | ENSG000000189052 | 289.5435591 | -2.012204062 |
| SPRR1B   | ENSG000000169469 | 81.63056767 | -2.021882409 |
| IL1RL1   | ENSG000000115602 | 128.2220729 | -2.083587734 |
| SEMA7A   | ENSG000000138623 | 714.4600124 | -2.240894635 |
| GOS2     | ENSG000000123689 | 420.7026442 | -2.358423864 |
| SERPINB2 | ENSG000000197632 | 38.14757941 | -2.456307183 |
| KRT6A    | ENSG000000205420 | 276.7473929 | -2.661880827 |

mbo-treated HPAF-II cells)

| pvalue   | padj     |
|----------|----------|
| 2.12E-33 | 4.04E-31 |
| 1.09E-49 | 4.88E-47 |
| 9.36E-25 | 9.09E-23 |
| 5.43E-12 | 1.56E-10 |
| 3.83E-28 | 5.18E-26 |
| 2.50E-22 | 1.99E-20 |
| 4.87E-12 | 1.42E-10 |
| 4.56E-21 | 3.34E-19 |
| 1.03E-12 | 3.25E-11 |
| 6.68E-19 | 4.34E-17 |
| 9.80E-17 | 4.93E-15 |
| 1.31E-15 | 5.87E-14 |
| 7.86E-16 | 3.62E-14 |
| 6.87E-10 | 1.41E-08 |
| 6.10E-16 | 2.85E-14 |
| 5.82E-18 | 3.30E-16 |
| 4.56E-23 | 3.80E-21 |
| 1.19E-10 | 2.73E-09 |
| 1.88E-15 | 8.31E-14 |
| 1.22E-11 | 3.35E-10 |
| 5.87E-22 | 4.56E-20 |
| 3.72E-30 | 5.93E-28 |
| 8.99E-11 | 2.14E-09 |
| 8.49E-15 | 3.50E-13 |
| 7.23E-09 | 1.28E-07 |
| 3.40E-13 | 1.15E-11 |
| 3.78E-35 | 8.66E-33 |
| 3.16E-20 | 2.20E-18 |
| 2.55E-10 | 5.60E-09 |
| 8.54E-14 | 3.13E-12 |
| 1.28E-06 | 1.43E-05 |
| 6.63E-27 | 7.94E-25 |
| 1.49E-06 | 1.63E-05 |
| 2.99E-06 | 3.07E-05 |
| 9.09E-28 | 1.17E-25 |
| 6.09E-08 | 9.08E-07 |
| 4.64E-09 | 8.48E-08 |
| 9.86E-10 | 1.96E-08 |
| 7.74E-10 | 1.57E-08 |
| 1.15E-08 | 1.95E-07 |
| 1.63E-34 | 3.36E-32 |

|          |          |
|----------|----------|
| 2.66E-47 | 1.08E-44 |
| 8.78E-61 | 7.89E-58 |
| 5.76E-62 | 6.04E-59 |
| 3.82E-30 | 6.01E-28 |
| 7.83E-38 | 2.05E-35 |
| 3.65E-40 | 1.09E-37 |
| 7.25E-36 | 1.75E-33 |
| 1.68E-26 | 1.94E-24 |
| 3.18E-29 | 4.71E-27 |
| 1.13E-10 | 2.62E-09 |
| 4.39E-06 | 4.32E-05 |
| 2.92E-50 | 1.41E-47 |
| 4.65E-07 | 5.76E-06 |
| 1.92E-50 | 9.67E-48 |
| 1.12E-21 | 8.41E-20 |
| 1.75E-06 | 1.89E-05 |
| 4.64E-17 | 2.43E-15 |
| 1.52E-27 | 1.91E-25 |
| 5.91E-50 | 2.75E-47 |
| 7.04E-31 | 1.18E-28 |
| 8.96E-27 | 1.04E-24 |
| 3.56E-14 | 1.35E-12 |
| 3.28E-21 | 2.43E-19 |
| 7.62E-55 | 4.85E-52 |
| 3.78E-10 | 8.10E-09 |
| 1.24E-25 | 1.34E-23 |
| 6.59E-17 | 3.38E-15 |
| 1.17E-11 | 3.20E-10 |
| 5.29E-17 | 2.74E-15 |
| 4.82E-46 | 1.90E-43 |
| 4.59E-07 | 5.70E-06 |
| 3.67E-32 | 6.41E-30 |
| 1.14E-09 | 2.25E-08 |
| 2.57E-30 | 4.15E-28 |
| 3.36E-12 | 1.01E-10 |
| 2.83E-51 | 1.48E-48 |
| 5.37E-67 | 6.76E-64 |
| 9.25E-33 | 1.66E-30 |
| 1.91E-18 | 1.16E-16 |
| 1.81E-15 | 8.06E-14 |
| 2.62E-39 | 7.50E-37 |
| 4.26E-10 | 8.98E-09 |
| 4.55E-19 | 2.97E-17 |
| 3.62E-44 | 1.30E-41 |

|           |           |
|-----------|-----------|
| 3.17E-26  | 3.57E-24  |
| 2.99E-76  | 7.53E-73  |
| 6.50E-22  | 5.02E-20  |
| 1.93E-11  | 5.12E-10  |
| 2.17E-47  | 9.11E-45  |
| 7.46E-73  | 1.34E-69  |
| 7.50E-28  | 9.83E-26  |
| 5.53E-52  | 3.02E-49  |
| 1.49E-40  | 4.57E-38  |
| 2.95E-18  | 1.73E-16  |
| 4.21E-55  | 2.94E-52  |
| 1.84E-14  | 7.29E-13  |
| 3.08E-63  | 3.52E-60  |
| 1.49E-20  | 1.08E-18  |
| 4.60E-40  | 1.35E-37  |
| 3.40E-23  | 2.87E-21  |
| 1.09E-23  | 9.77E-22  |
| 2.55E-20  | 1.79E-18  |
| 1.25E-111 | 5.24E-108 |
| 9.02E-111 | 2.84E-107 |
| 1.94E-44  | 7.18E-42  |
| 3.16E-28  | 4.33E-26  |
| 2.67E-55  | 1.98E-52  |
| 3.15E-29  | 4.71E-27  |
| 9.57E-29  | 1.40E-26  |
| 5.35E-43  | 1.77E-40  |
| 2.34E-61  | 2.26E-58  |
| 3.03E-36  | 7.64E-34  |
| 1.74E-70  | 2.73E-67  |
| 1.46E-18  | 8.94E-17  |
| 1.76E-127 | 2.21E-123 |
| 1.73E-29  | 2.65E-27  |
| 6.77E-25  | 6.71E-23  |
| 9.42E-61  | 7.90E-58  |
| 2.97E-27  | 3.67E-25  |
| 2.38E-30  | 3.89E-28  |
| 4.15E-112 | 2.61E-108 |
| 3.87E-73  | 8.13E-70  |
| 4.00E-27  | 4.89E-25  |
| 3.40E-67  | 4.75E-64  |
