# Supplementary material for: HGF/MET Axis Induces Tumor Secretion of Tenascin-C and Promotes Stromal Rewiring in Pancreatic Cancer
Source: MDPI journal article supplement (doi:10.3390/cancers13143519), 2021-07-14
Supplement: s1 [file s1]

Supplementary Table S4: candidate genes mediating the tumor/stroma crosstalk

| ACRONYM   | NAME                                 | FUNCTION                                                                                                                                                                                         | EXPRESSION PATTERN                                                                                                                                                                               | ROLE IN DISEASE                                                                                         |
|-----------|--------------------------------------|--------------------------------------------------------------------------------------------------------------------------------------------------------------------------------------------------|--------------------------------------------------------------------------------------------------------------------------------------------------------------------------------------------------|---------------------------------------------------------------------------------------------------------|
| CLCF1     | Cardiotrophin like cytokine factor 1 | Neurotrophic factor, B-cell stimulatory agent and neuroendocrine modulator of pituitary corticotroph function                                                                                    | .                                                                                                                                                                                                | Involved in cold-induced sweating syndrome 2 (CISS2)                                                    |
| MMP10     | Matrix Metallo Peptidase 10          | Matrix metalloproteinase; breaks down fibronectin, laminin, elastin, proteoglycan core protein, gelatins, and several types of collagen                                                          | Not expressed in normal tissues . Expression is induced in response to injury, infection, or transformation                                                                                      | Involved in arthritis and metastasis                                                                    |
| LAMC2     | Laminin Subunit Gamma 2              | Subunit of laminin 5 (earlier known as kalinin); involved in the connection of epithelial cells to the basement membrane.                                                                        | Expressed in several fetal tissues, specifically localized to epithelial cells in skin, lung and kidney                                                                                          | Associated with junctional epidermolysis bullosa                                                        |
| MMP1      | Matrix Metallo Peptidase 1           | Matrix metalloproteinase; cleaves several types of collagen                                                                                                                                      | Esxpressed mainly in vascular tissssues; produced mostly by platelets                                                                                                                            | Associated with chronic obstructive pulmonary disease (COPD)                                            |
| TGF A     | Transforming growth factor alpha     | Growth factor, ligand for EGF receptor; involved in cell proliferation, differentiation and development                                                                                          | Widely expressed in normal tissues                                                                                                                                                               | Associated with many types of cancers; involved in cleft lip/palate                                     |
| PLAU      | Plasminogen activator                | Serine protease; converts the zymogen plasminogen to the active enzyme plasmin                                                                                                                   | Expressaed in a variety of tissues; upregulated in response to inflammatory cytokines                                                                                                            | Associated with Quebec platelet disorder and late-onset Alzheimer's disease                             |
| SERPIN E1 | Serpin family E member 1             | Serine proteinase inhibitor; principal inhibitor of tissue plasminogen activator (tPA) and urokinase (uPA); inhibitor of fibrinolysis; involved in the regulation of cell adhesion and spreading | Widely expressed in various tissues; produced mainly by endothelial cells                                                                                                                        | Associated with plasminogen activator inhibitor-1 deficiency (PAI-1 deficiency) and thrombophilia       |
| SERPIN B2 | Serpin family B member 2             | Serine proteinase inhibitor; inhibits urokinase-type plasminogen activator                                                                                                                       | Expression restricted to some cell types (keratinocytes, trophoblasts, macrophages, neurons), and is induced in response to cellular stress; produced mainly by monocytes                        | Associated with inflammatory diseases like pre-eclampsia, lupus, asthma, scleroderma, and periodontitis |
| TNC       | Tenascin C                           | Extracellular matrix protein; modulator of cell adhesion; involved in neuron and axon guidance                                                                                                   | Widely expressed in embryonic tissues; in adults, expression is very restricted, and is rapidly induced during wound healing, infection, inflammation , cancer; secreted mainly by stromal cells | In tumors, stimulates angiogenesis by elongation, migration and sprouting of endothelial cells          |
| CXCL8     | C-X-C Motif Chemokine Ligand 8       | Chemotactic factor; major mediator of the inflammatory response; activates MMPs                                                                                                                  | Barely detectable in physiological conditions; expression is induced by pro-inflammatory cytokines; secreted mainly by neutrophils                                                               | Associated to the pathogenesis of bronchiolitis                                                         |
