# Supplementary material for: HGF/MET Axis Induces Tumor Secretion of Tenascin-C and Promotes Stromal Rewiring in Pancreatic Cancer
Source: Cancers (Basel). 2021 Jul 14;13(14):3519. doi: 10.3390/cancers13143519 (PMC8305254; doi:10.3390/cancers13143519)
Supplement: Supplementary file 1 [file cancers-13-03519-s001.zip]

Archive with 5 entries (5 files):
- cancers-1224808-suppl. figures 1-8.pdf
- Table S1_Modica et al..pdf
- Table S2_Modica et al..pdf
- Table S3_Modica et al..pdf
- Table S4_Modica et al..pdf
